# Supplementary material for: The generation of stable microvessels in ischemia is mediated by endothelial cell derived TRAIL
Source: PubMed Central journal article supplement — Sci Adv. 2024 Oct 4;10(40):eadn8760. doi: 10.1126/sciadv.adn8760 (PMC11451529; doi:10.1126/sciadv.adn8760), 2024-10-04
Supplement: sciadv.adn8760_sm.pdf [file sciadv.adn8760_sm.pdf]

Supplementary Materials for

**The generation of stable microvessels in ischemia is mediated by endothelial cell derived TRAIL**

Siân P. Cartland *et al.*

Corresponding author: Mary M. Kavurma, [mary.kavurma@hri.org.au](mailto:mary.kavurma@hri.org.au)

*Sci. Adv.* **10**, eadn8760 (2024)  
DOI: 10.1126/sciadv.adn8760

**The PDF file includes:**

Figs. S1 to S8  
Tables S1 to S8  
Legend for data S1  
References

**Other Supplementary Material for this manuscript includes the following:**

Data S1

# SUPPLEMENTARY FIGURES

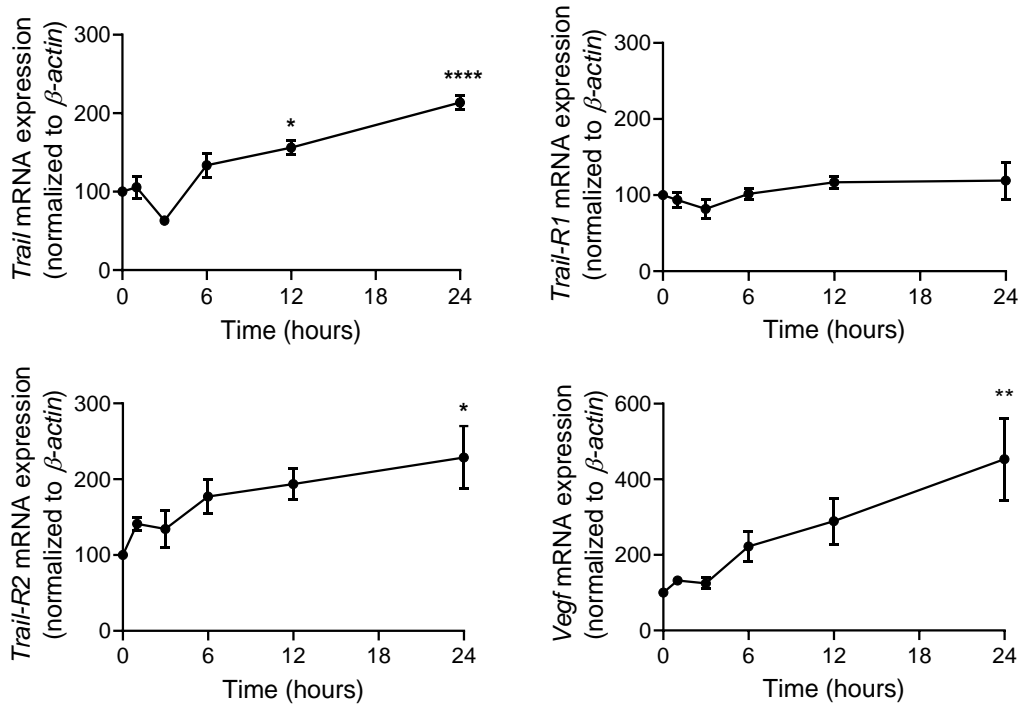

**Fig. S1.**

**Hypoxia increases *Trail* and *Trail-R2*, but not *Trail-R1* mRNA expression over 24 h.** Serum-arrested HMEC-1 were exposed to hypoxia (2% O<sub>2</sub>) over 24 h. RNA harvested, and cDNA generated for qPCR. mRNA was normalized to  $\beta$ -actin (n=3/group). *Vegf* mRNA was assessed as a positive control. Results are mean $\pm$ SEM; One-way ANOVA; \* $P$ <0.05, \*\* $P$ <0.01 and \*\*\*\* $P$ <0.0001.

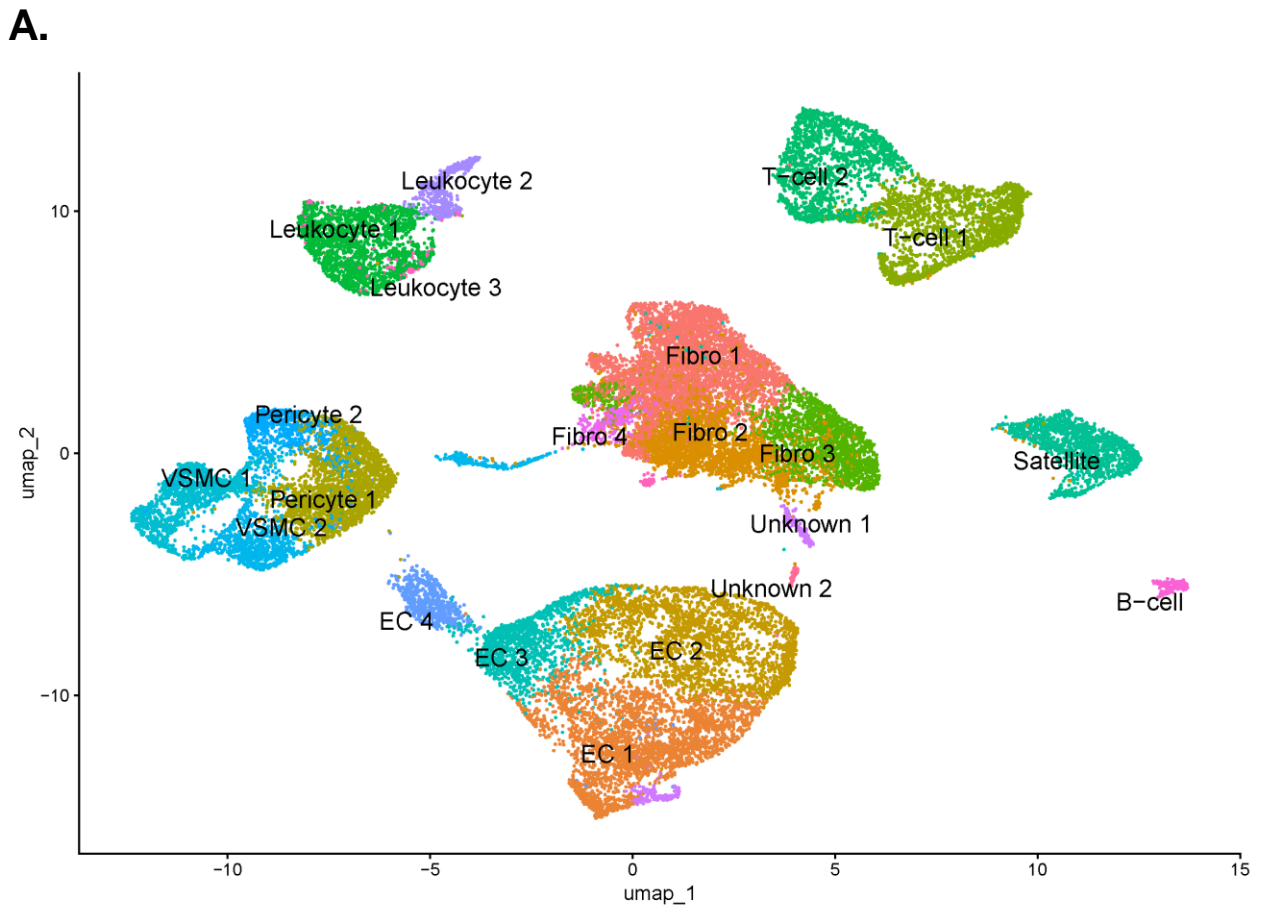

### B.

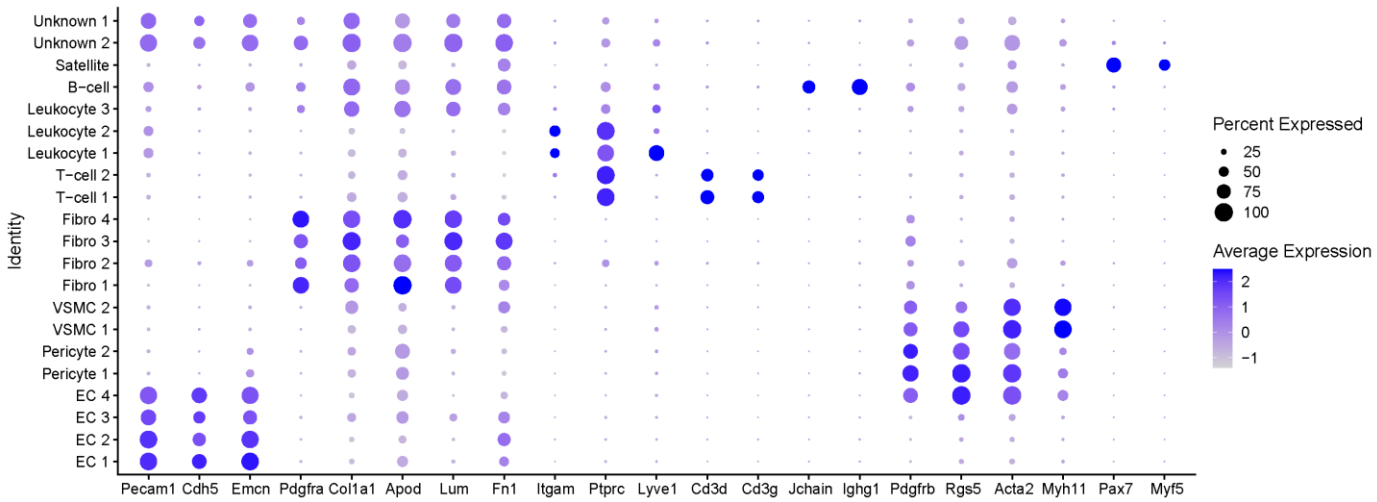

C.

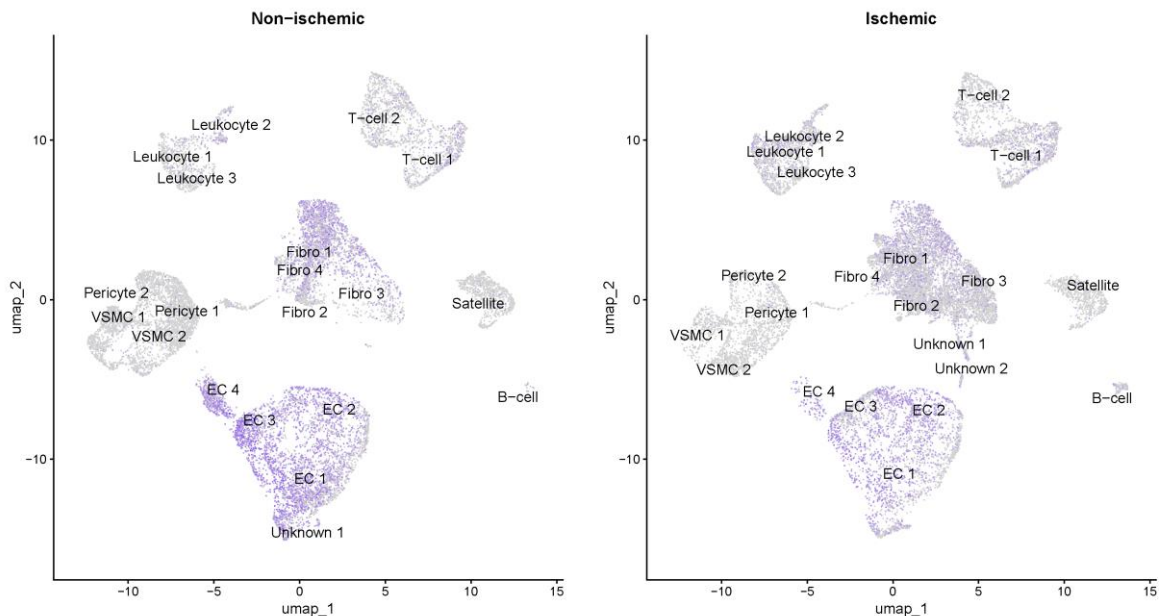

D.

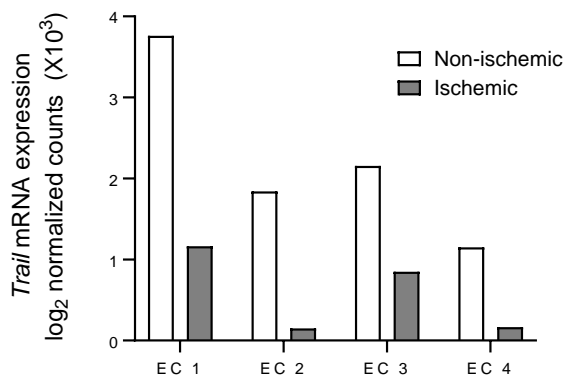

E.

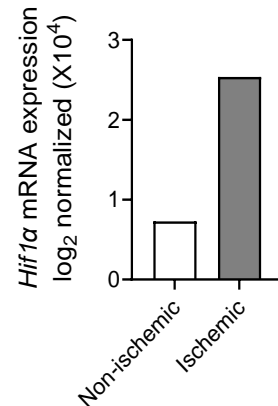

F.

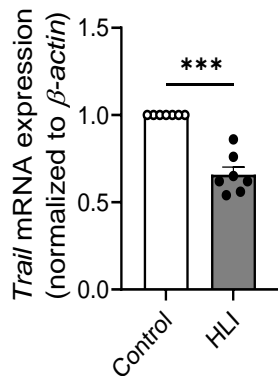

G.

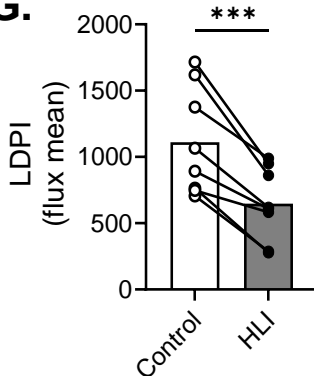

H.

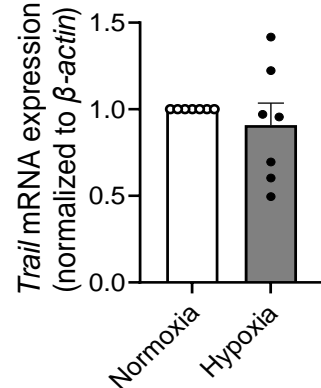

**Fig. S2.**

**ECs are a major source of TRAIL in human limb tissue.** (A) Principal component analysis followed by K-nearest neighbour clustering identified 4 EC clusters (EC 1-4). Additional cell clusters include: pericytes 1-2; vascular smooth muscle cell (VSMC 1-2); satellite cells (Satellite); leukocytes 1-3; T-cells 1-2; fibroblasts (Fibro 1-4); B-cells; (B) Dot plot showing differentially expressed genes for annotated cell populations. (C) *Trail* expression and distribution. (D) *Trail* mRNA expression in EC clusters 1 to 4, normalized to cell counts. (E) *Hif1α* mRNA expression in total ECs, normalized to cell counts. (F) *Trail* mRNA expression and (G) blood perfusion in C57Bl6 mouse limb tissues 14 d after hindlimb ischemia (HLI) (n=7). (H) *Trail* mRNA expression in HMEC-1 after 7 d of hypoxia (n=7/group). All mRNA was normalized to  $\beta$ -actin. Results are mean $\pm$ SEM; Mann-Whitney *U*-test, Paired *t*-test; \*\*\**P*<0.01.

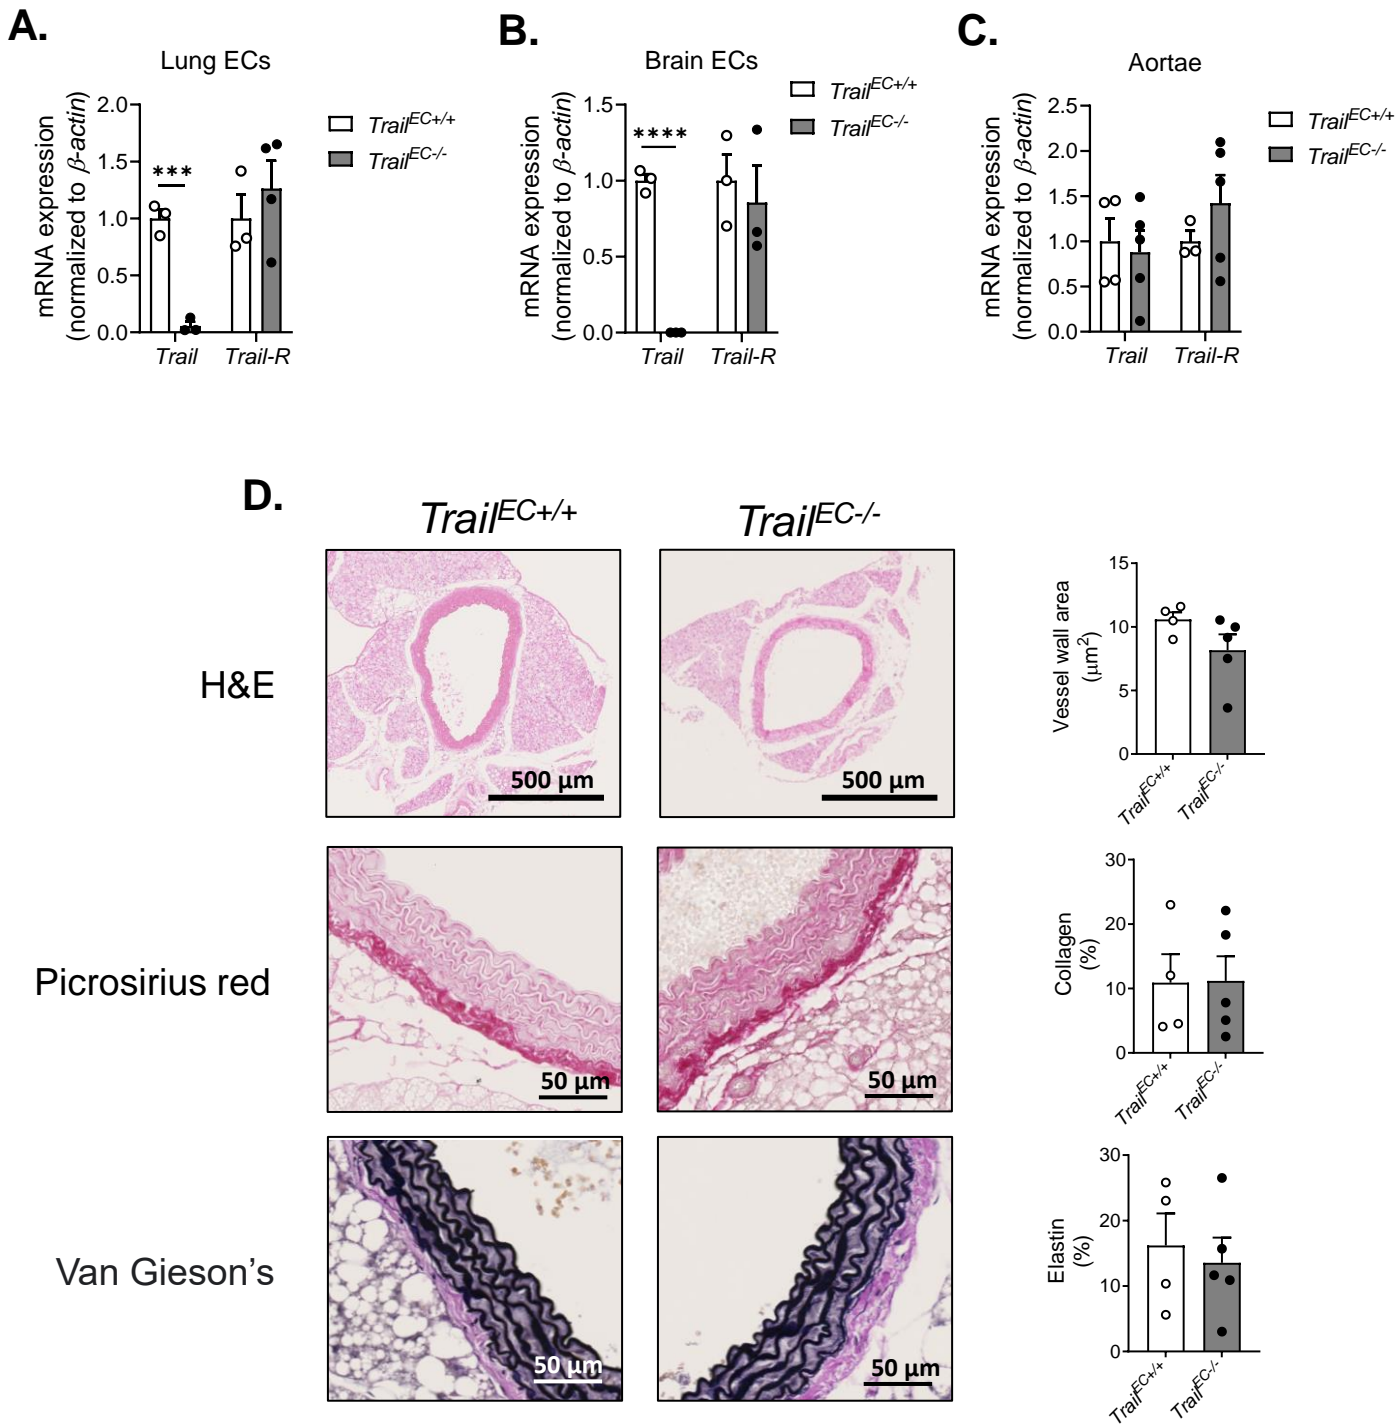

**Fig. S3.**

**TRAIL deletion is specific to ECs, with no effect on large vessel structure in *Trail*<sup>EC-/-</sup> mice.** *Trail*, but not *Trail-R* mRNA expression is reduced in ECs isolated from (A) lung and (B) brain from *Trail*<sup>EC-/-</sup> mice (n=3/group). (C) *Trail* or *Trail-R* mRNA in aortae of *Trail*<sup>EC-/-</sup> and *Trail*<sup>EC+/+</sup> mice. mRNA normalized to  $\beta$ -actin (n=3-5/group). (D) Paraffin-embedded cross section of aortae from *Trail*<sup>EC-/-</sup> and *Trail*<sup>EC+/+</sup> mice stained for hematoxylin and eosin (H&E), picrosirius red (collagen) and Van Gieson's (elastin); scale bars as indicated (n=4-5/genotype). Results are mean $\pm$ SEM. Mann-Whitney *U*-test; \*\*\**P*<0.001 and \*\*\*\**P*<0.0001.

**A.***Trail*<sup>+/+</sup> EC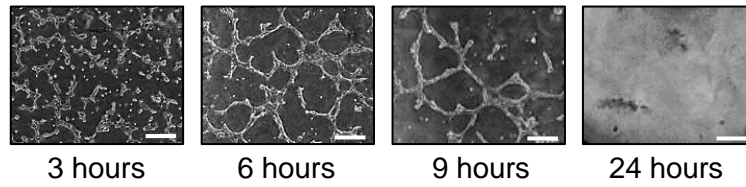**B.**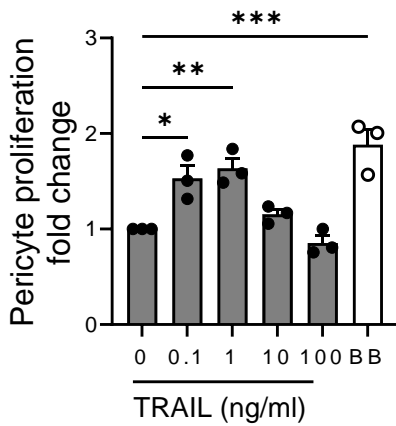**C.**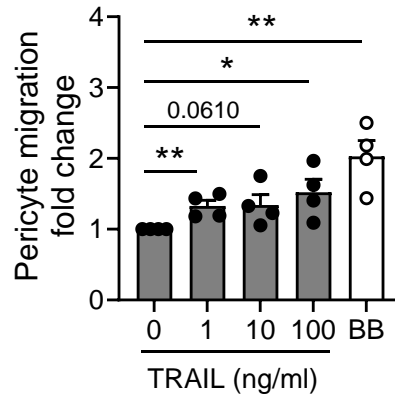**D.**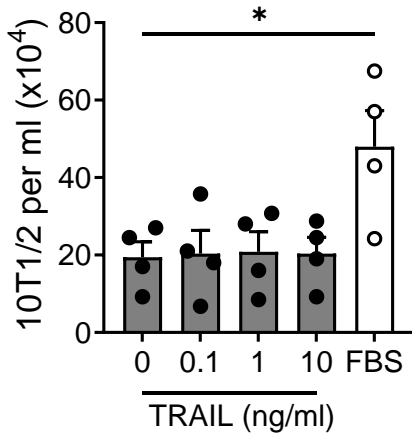**E.**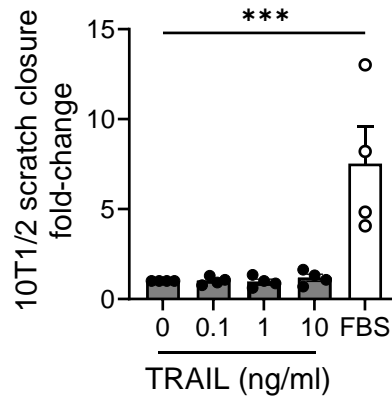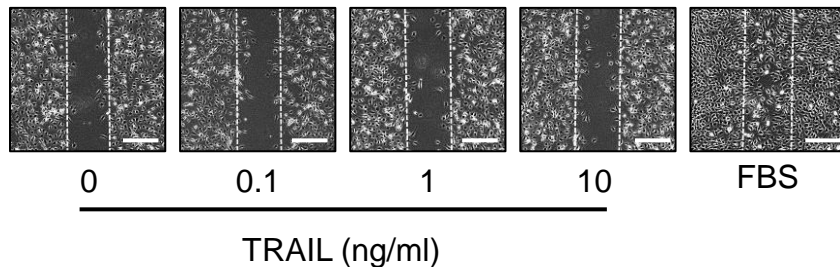**Fig. S4.**

**Tubulogenesis and pericyte migration.** (A) Representative image showing *Trail*<sup>+/+</sup> ECs formed tubules by 6-9 h but dissociated by 24 h; scale bar 250  $\mu$ m. (B) Pericyte proliferation at 24 h (n=3/group) and (C) pericyte Transwell migration to recombinant TRAIL at 8 h (n=4/group). PDGF-BB (BB; 20 ng/ml) was used as positive control. ECs and pericytes were isolated from mouse brain. (D) 10T1/2 cell proliferation at 24 h. (E) 10T1/2 migration via scratch assay at 24 h; *top*, quantification; *bottom*, representative images. Both are unaltered with recombinant human TRAIL at 24 h. 10% FBS was used as a positive control. Dotted lines indicate denuded zone; scale bar 200  $\mu$ m (n=4/group). Results are mean $\pm$ SEM; one-way ANOVA or Student's *t*-test; \**P*<0.05, \*\**P*<0.01 and \*\*\**P*<0.001.

**A.**

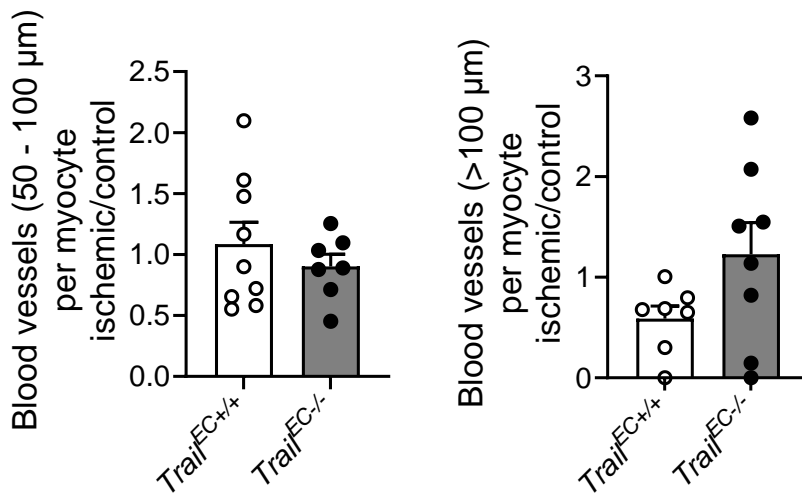

**B.**

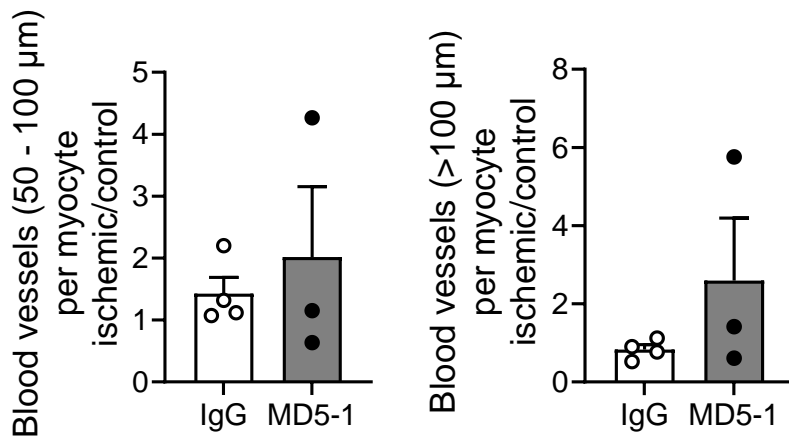

**C.**

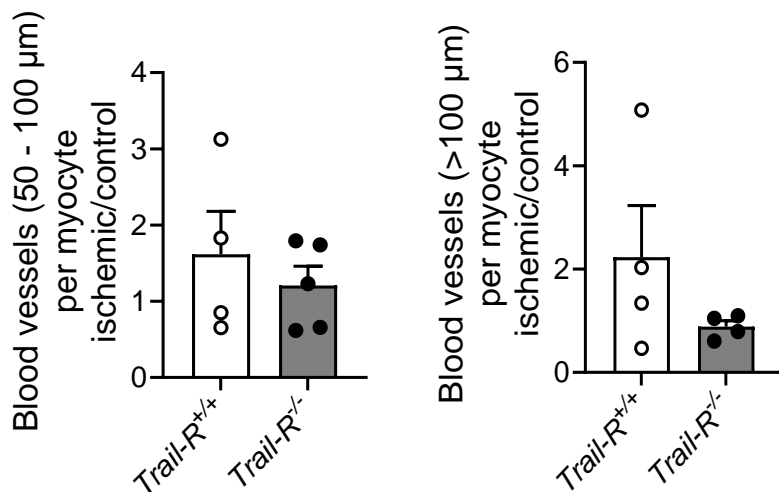

**Fig. S5.**

**Large vessel numbers are unaltered in ischemic limbs.** Large vessel numbers 50-100 and >100  $\mu\text{m}$  are unaltered in ischemic gastrocnemius muscle from: (A) *Trail<sup>EC</sup>/+* vs. *Trail<sup>EC</sup>/-* mice 28 d post-HLI (n=7-9/genotype); (B) *Trail<sup>EC</sup>/-* treated with MD5-1 or IgG 7 d post-HLI (n=3-4/treatment); and (C) *Trail<sup>R</sup>/+* vs. *Trail<sup>R</sup>/-* mice 28 d post-HLI (n=4-5/genotype). Results are mean $\pm$ SEM. Students *t*-test.



**A.**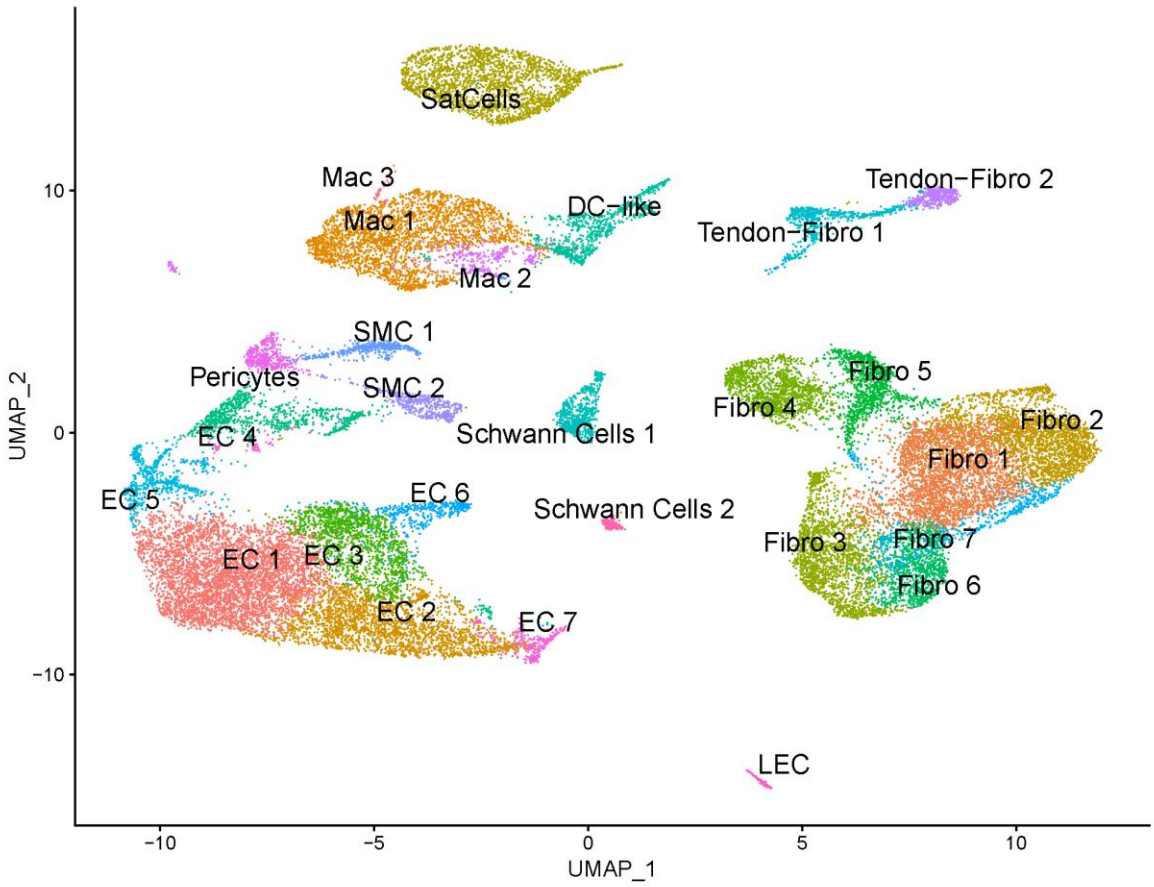**B.**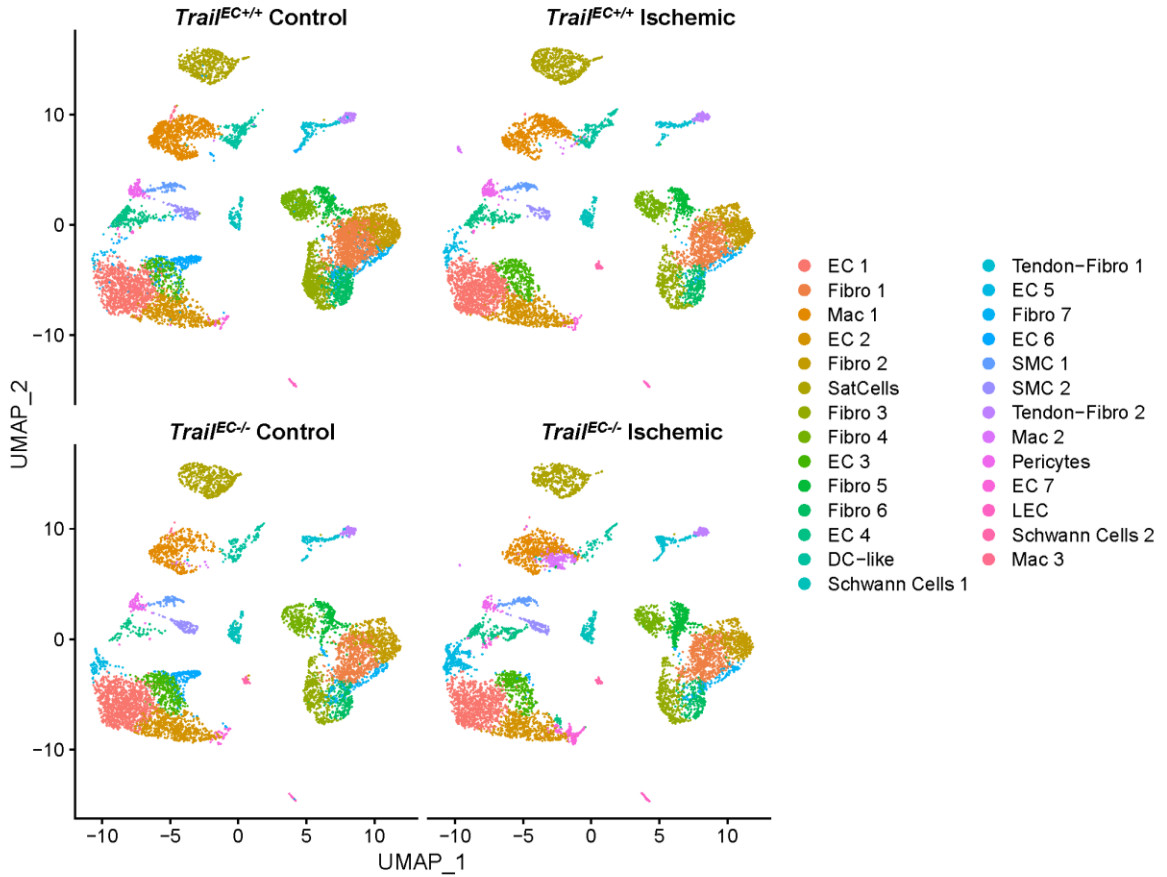



**C.**

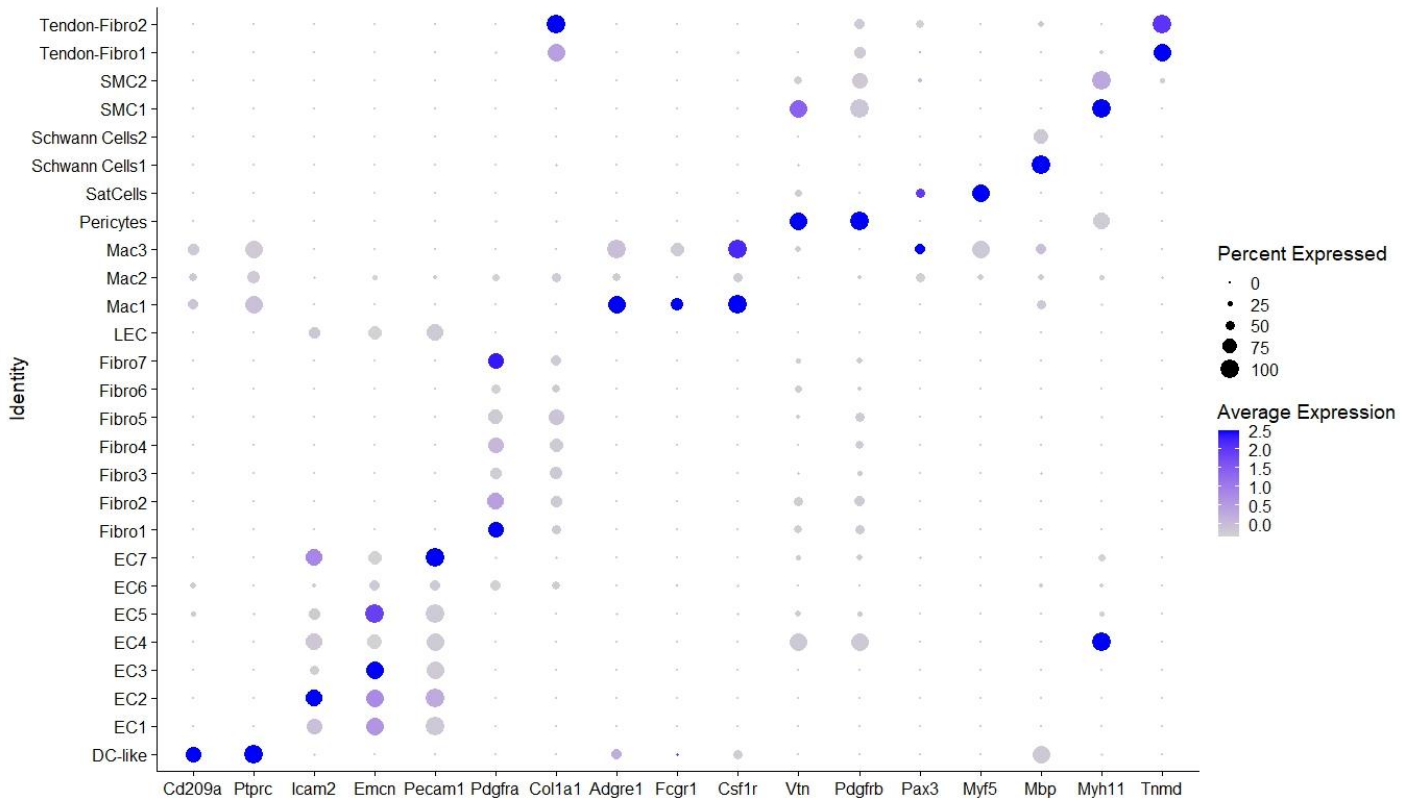

**D.**

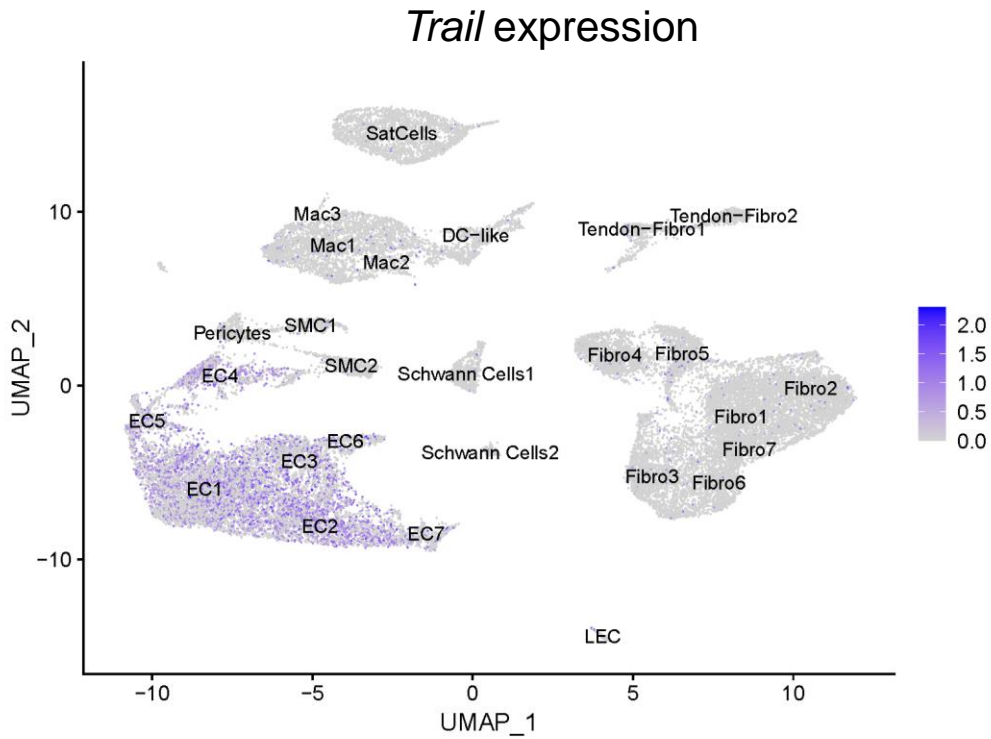

**E.**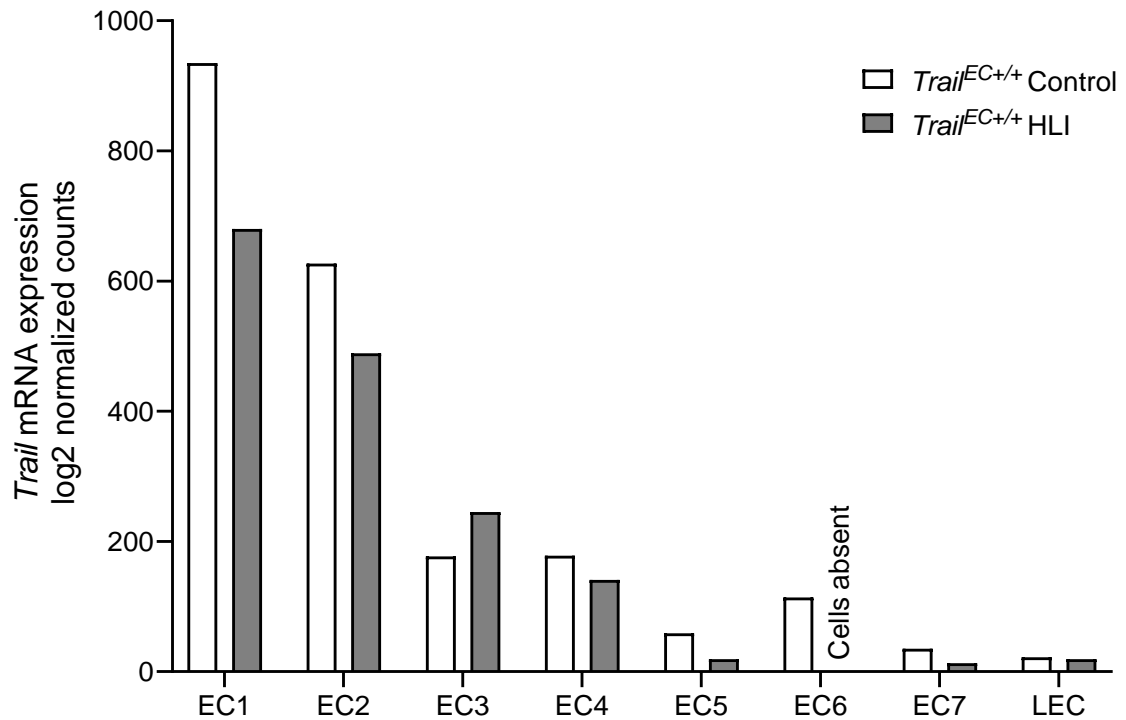**F.**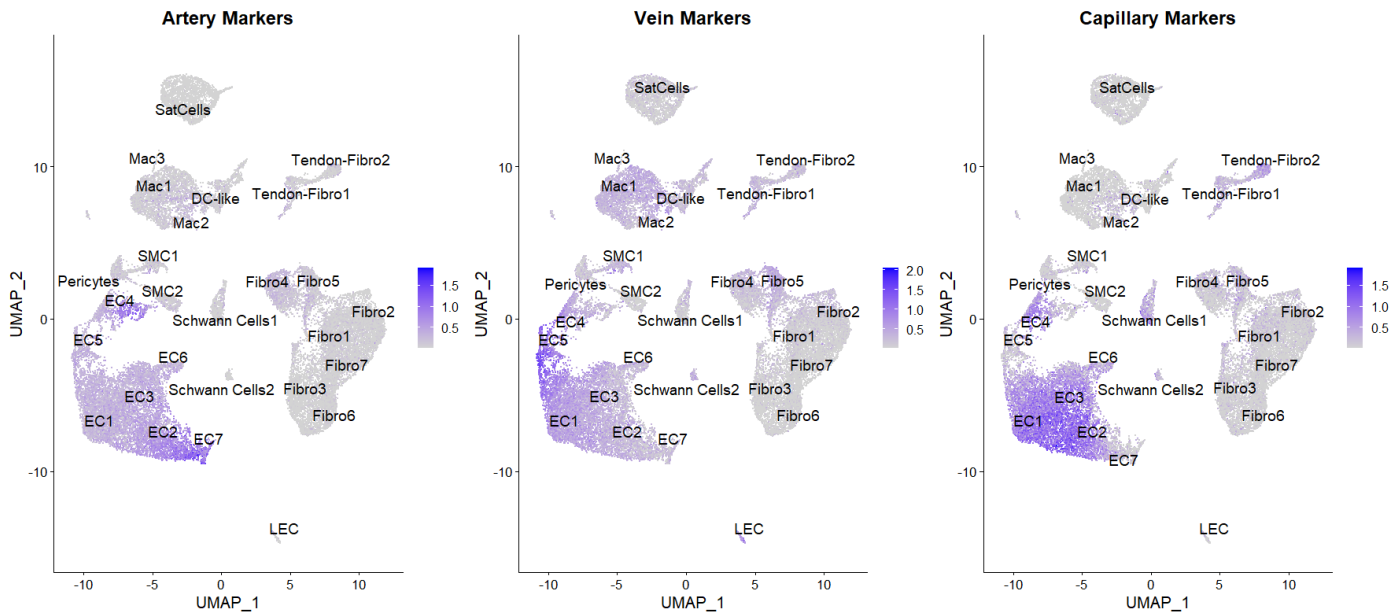**Fig. S6.**

**scRNA-seq of gastrocnemius muscle.** (A) Principal component analysis followed by K-nearest neighbour clustering identified 8 EC (EC1-7, LEC) and 1 Pericyte cluster. Additional cell clusters included: smooth muscle cells (SMC1-2); satellite cells (SatCell); dendritic cell-like (DC-like); macrophages (Mac1-3); fibroblasts (Fibro1-7); Schwann cells 1-2; tendon fibroblasts (Tendon-Fibro1-2). (B) Cell clusters in each group. (C) Dot plot showing differentially expressed genes for annotated cell populations. *Trail* expression in (D) all clusters or in (E) EC subtypes. (F) Clusters marking arteries, veins and capillaries.

**A.** Upregulated genes; ischemic vs. non-ischemic limbs of *Trail*<sup>EC+/+</sup>

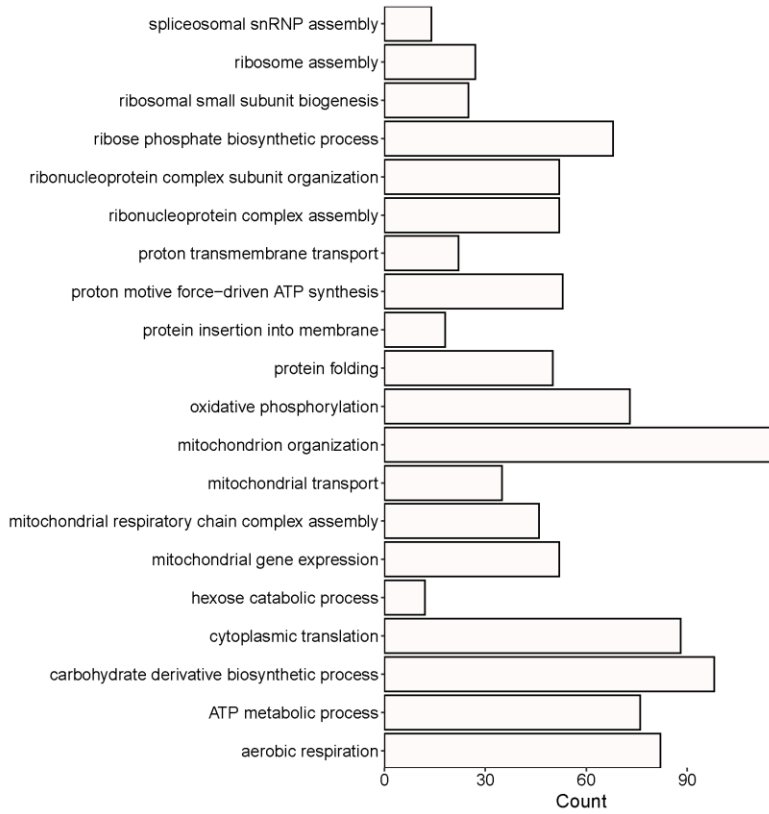

**B.** Upregulated genes; ischemic vs. non-ischemic limbs of *Trail*<sup>EC-/-</sup>

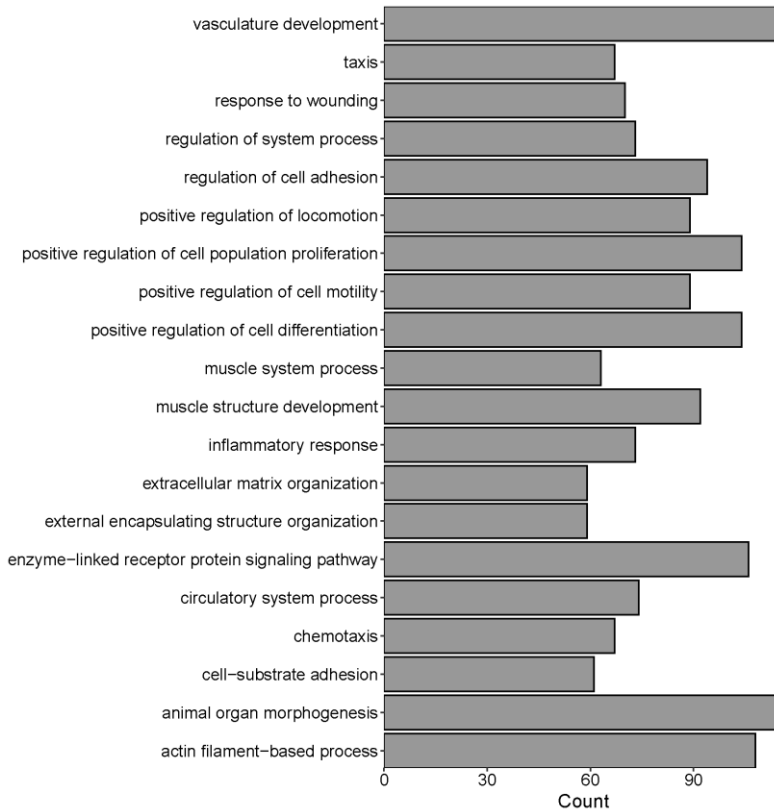

C.

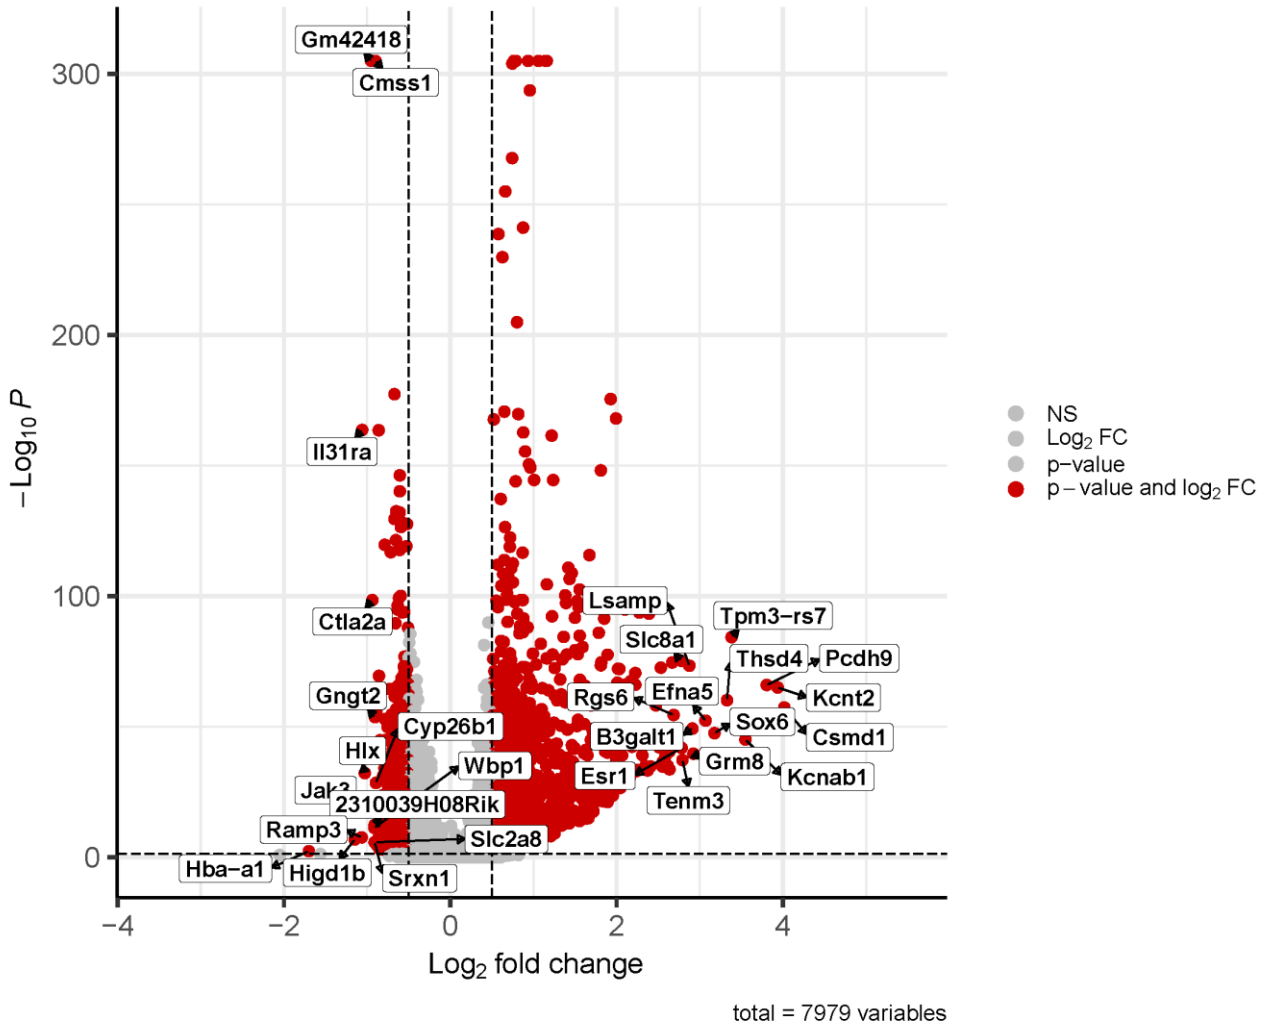

**Fig. S7.**

**Differentially expressed genes in EC microvessel populations are altered in limbs of *Trail<sup>EC-/-</sup>* mice.** (A) *Trail<sup>EC+/+</sup>* and (B) *Trail<sup>EC-/-</sup>* EC1-EC7 clusters in ischemic tissues showing altered biological processes. (C) Volcano plot showing top up-regulated and down-regulated differentially expressed genes from *Trail<sup>EC-/-</sup>* vs *Trail<sup>EC+/+</sup>* ischemic tissues.

A.

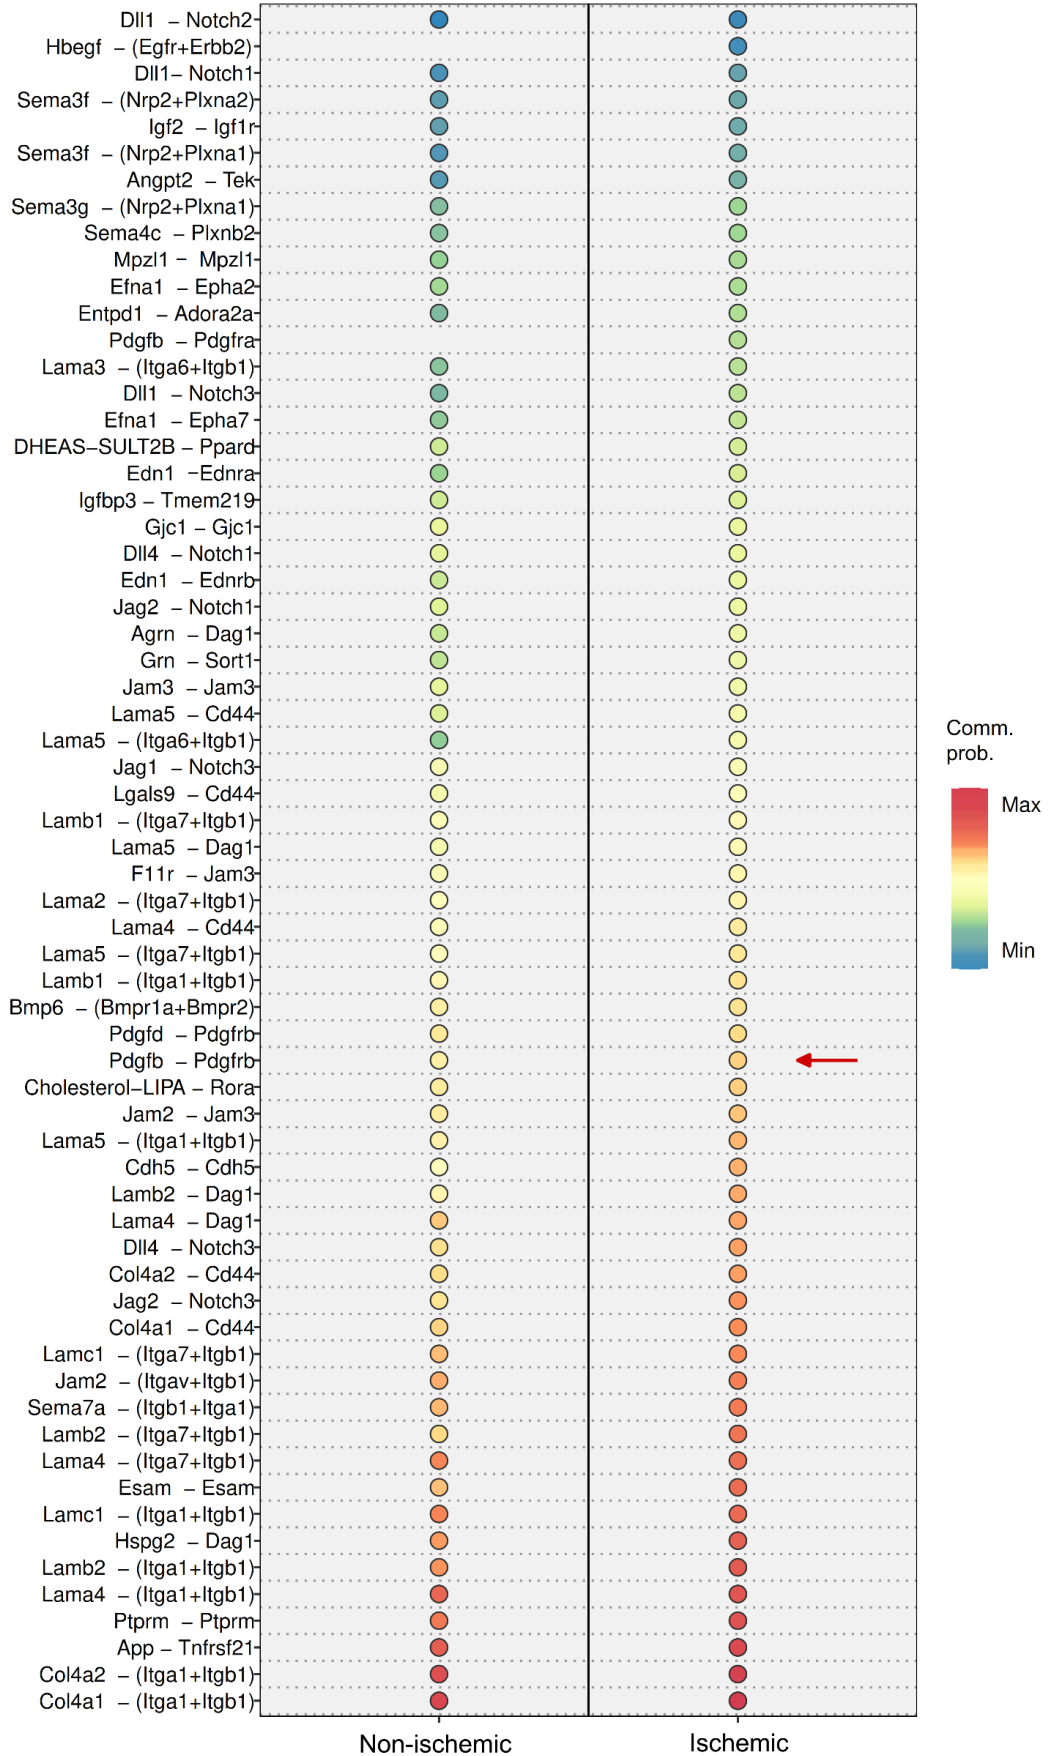

**B.**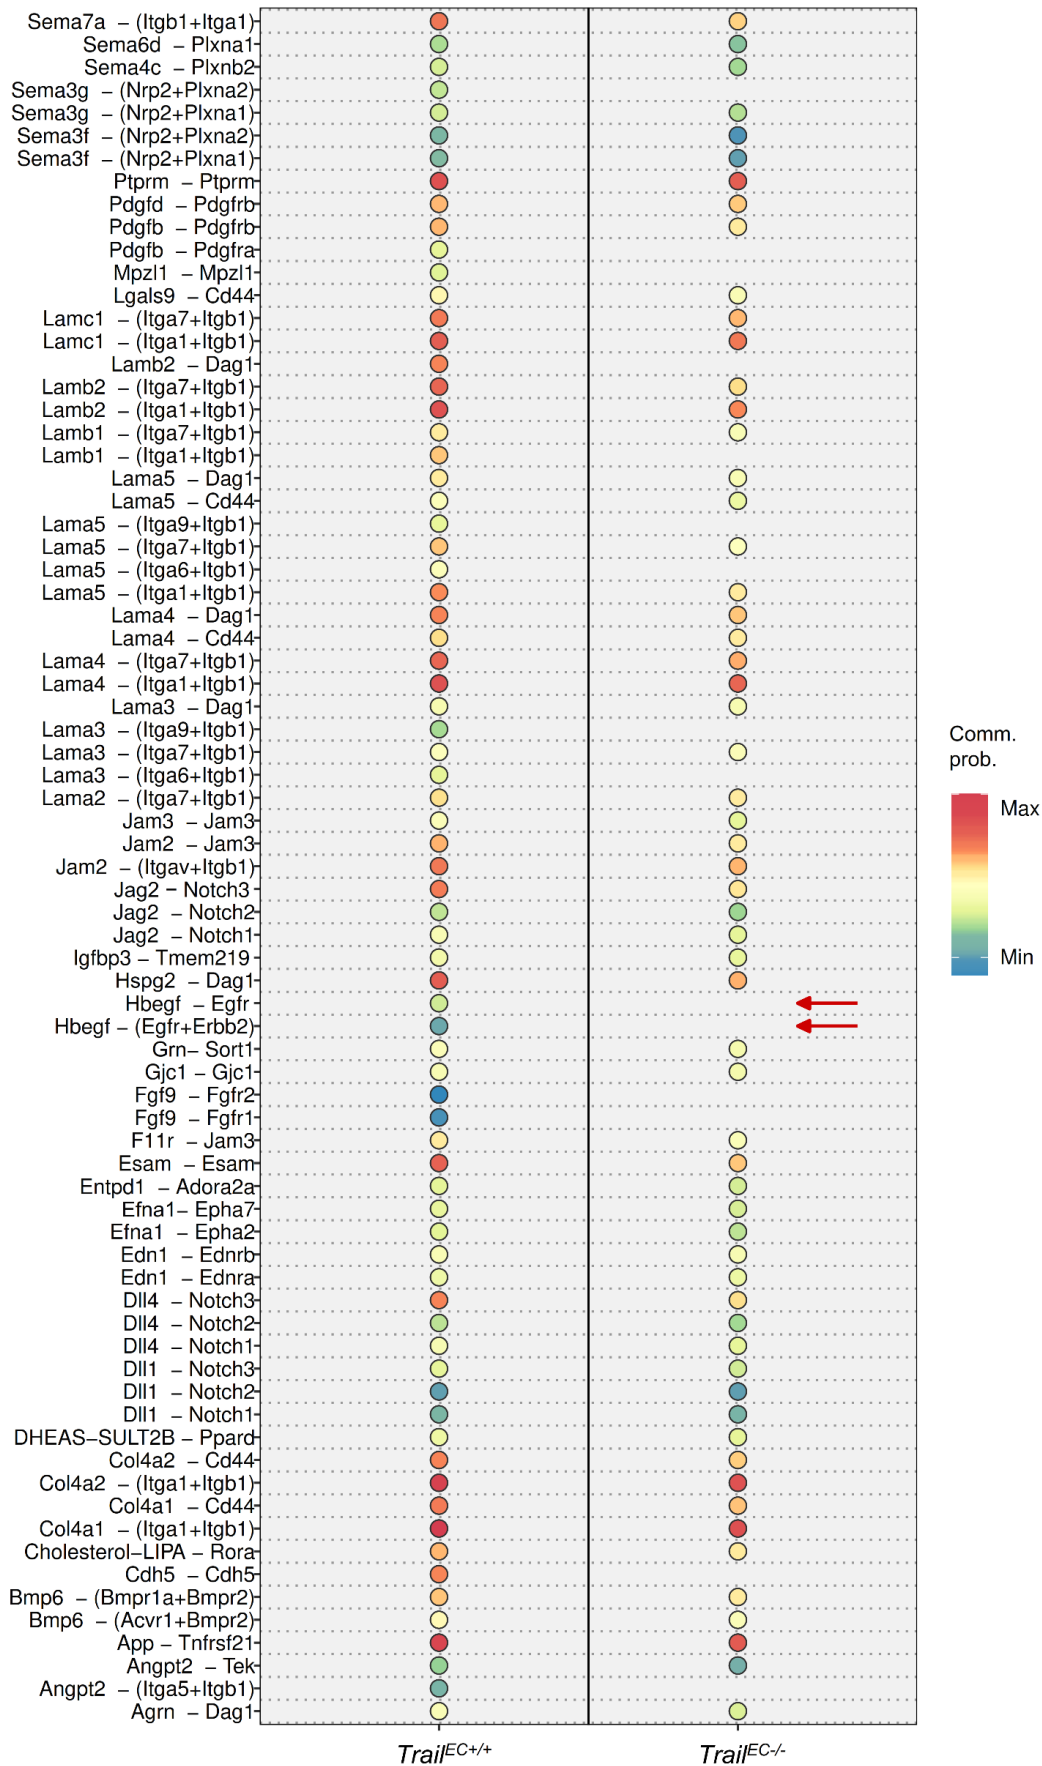

**Fig. S8.**  
**TRAIL-dependent EC-pericyte interactions.** (A) CellChat analysis showing EC-pericyte interactions, control vs ischemic limb of *Trail*<sup>EC+/+</sup> mice. Red arrow depicting PDGFB-PDGFR $\beta$  interactions. (B) CellChat analysis showing EC-pericyte interactions of ischemic limbs between *Trail*<sup>EC+/+</sup> and *Trail*<sup>EC-/-</sup> mice. Red arrows depicting loss of HBEGF-EGFR and HBEGF-EGFR/ERBB2 interactions in ischemic limbs of *Trail*<sup>EC-/-</sup> mice.

## SUPPLEMENTARY TABLES

**Table S1.**

**Human demographics.**

| <b>Characteristic</b>     | <b>PAD Patients<br/>n=11</b> | <b>Healthy Controls<br/>n=12</b> |
|---------------------------|------------------------------|----------------------------------|
| Age (y) Mean (SD)         | 66.1 (10.0)                  | 38.9 (12.1)                      |
| Female (%)                | 4 (36)                       | 8 (67)                           |
| Body Mass Index Mean (SD) | 30.0 (7.4)                   | ND                               |
| Hypertension (%)          | 7 (63.6)                     | N/A                              |
| Diabetic (%)              | 9 (81.8)                     | N/A                              |
| Hypercholesterolemia (%)  | 8 (72.7)                     | N/A                              |
| Smoker (%)                | 9 (81.8)                     | ND                               |
| Myocardial Infarction (%) | 7 (63.6)                     | N/A                              |

ND, not determined; N/A, not applicable.



**Table S2.****Plasma chemistries of adult *Trail*<sup>EC+/+</sup> and *Trail*<sup>EC-/-</sup> mice**

|                          | <i>Trail</i> <sup>EC+/+</sup> | <i>Trail</i> <sup>EC-/-</sup> | <i>P</i> value | <i>n per group</i> |
|--------------------------|-------------------------------|-------------------------------|----------------|--------------------|
| <b>Glucose mmol/L</b>    | 10.29 ± 0.42                  | 10.12 ± 0.44                  | 0.787          | 6-7                |
| <b>Insulin mg/L</b>      | 0.3 ± 0.07                    | 0.5 ± 0.22                    | 0.105          | 6-8                |
| <b>Cholesterol mg/dL</b> | 115.6 ± 13.22                 | 107.8 ± 23.18                 | 0.310          | 6-8                |
| <b>TRAIL pg/mL</b>       | 10782 ± 1963                  | 4649 ± 338                    | 0.002          | 6                  |

**Table S3.**

**Markers used to identify artery, vein, and capillaries from EC populations.**

| <b>Vessel Type</b> | <b>Marker</b> |
|--------------------|---------------|
| Artery             | <i>Acvrl1</i> |
|                    | <i>Bmx</i>    |
|                    | <i>Crip1</i>  |
|                    | <i>Efnb2</i>  |
|                    | <i>Fbln2</i>  |
|                    | <i>Gja4</i>   |
|                    | <i>Gja5</i>   |
|                    | <i>Gkn3</i>   |
|                    | <i>Hey1</i>   |
|                    | <i>Hey2</i>   |
|                    | <i>Mecom</i>  |
|                    | <i>Nrp1</i>   |
|                    | <i>Sat1</i>   |
|                    | <i>Sema3g</i> |
| <i>Sox17</i>       |               |
| Vein               | <i>Apoe</i>   |
|                    | <i>Bgn</i>    |
|                    | <i>Ctla2a</i> |
|                    | <i>Emcn</i>   |
|                    | <i>Ephb4</i>  |
|                    | <i>Il6st</i>  |
|                    | <i>Nr2f2</i>  |
|                    | <i>Nrp2</i>   |
|                    | <i>Ptgs1</i>  |
|                    | <i>Selp</i>   |
|                    | <i>Tmsb10</i> |
| <i>Tmsb4x</i>      |               |
| <i>Vwf</i>         |               |
| Capillary          | <i>Car4</i>   |
|                    | <i>Kdr</i>    |
|                    | <i>Mfsd2a</i> |
|                    | <i>Plvap</i>  |
|                    | <i>Rgcc</i>   |
|                    | <i>Sgk1</i>   |
| <i>Sparc</i>       |               |

**Table S4.****The top 15 up-regulated genes in ischemic limb tissues of *Trail*<sup>EC-/-</sup> mice.**

| <b>Gene</b>     | <b>Fold Change</b> | <b>P value</b> | <b>Function</b>                                                                                              | <b>Reference</b> |
|-----------------|--------------------|----------------|--------------------------------------------------------------------------------------------------------------|------------------|
| <i>Csmd1</i>    | 16.17723187        | 4.44054E-58    | Tumour suppressor; inhibits proliferation, migration and invasion of cancerous cells                         | (68)             |
| <i>Kcnt2</i>    | 15.30062718        | 9.53328E-66    | Voltage-gated potassium channel subunit; involved in blood pressure regulation                               | (69)             |
| <i>Pcdh9</i>    | 13.97038328        | 1.07846E-66    | Protocadherin, mediated cell-cell adhesion in neural tissue                                                  | (70)             |
| <i>Kcnab1</i>   | 11.69655966        | 8.23554E-46    | Voltage-gated potassium channel subunit; involved in blood pressure regulation                               | (71)             |
| <i>Tpm3-rs7</i> | 10.42682927        | 5.01724E-85    | Pseudogene                                                                                                   |                  |
| <i>Thsd4</i>    | 10.03501363        | 7.15917E-61    | Variants associated with thoracic aortic aneurysm predisposition                                             | (72)             |
| <i>Sox6</i>     | 9.040404717        | 2.97456E-48    | Tumour suppressor; inhibits inducible EC proliferation and tubule formation                                  | (73)             |
| <i>Efna5</i>    | 8.390461672        | 4.60505E-53    | Involved in retinal neovascularisation                                                                       | (74)             |
| <i>Grm8</i>     | 7.584277003        | 2.20594E-40    | Mediates EC proliferation and tubule formation                                                               | (75)             |
| <i>B3galt1</i>  | 7.518566799        | 5.21455E-50    | Involved in brain development                                                                                | (76)             |
| <i>Lsamp</i>    | 7.332219299        | 4.24164E-74    | Polymorphisms associated with coronary artery disease                                                        | (77)             |
| <i>Tenm3</i>    | 6.926393728        | 6.24619E-38    | Transmembrane protein; involved in ERK/AKT/SAT3 activation                                                   | (78)             |
| <i>Esr1</i>     | 6.874832485        | 1.45671E-42    | Involved in VEGFA regulation in adipose tissue                                                               | (79)             |
| <i>Slc8a1</i>   | 6.846967715        | 5.84893E-76    | Na <sup>+</sup> /Ca <sup>2+</sup> exchanger, maintains Ca <sup>2+</sup> homeostasis; stimulates angiogenesis | (80)             |
| <i>Rgs6</i>     | 6.43223378         | 3.23921E-55    | Required for normal cardiovascular development                                                               | (81)             |

**Table S5.****The top 15 down-regulated genes in ischemic limb tissues of *Trail*<sup>EC-/-</sup> mice.**

| <b>Gene</b>          | <b>Fold Change</b> | <b>P value</b> | <b>Function</b>                                                                                           | <b>Reference</b> |
|----------------------|--------------------|----------------|-----------------------------------------------------------------------------------------------------------|------------------|
| <i>Hba-a1</i>        | -3.248921374       | 0.005029777    | Haemoglobin chain; acts as a nitrite reductase in ECs                                                     | (82)             |
| <i>Higd1b</i>        | -2.216554847       | 1.44602E-07    | Pericyte marker                                                                                           | (83)             |
| <i>Ramp3</i>         | -2.093268791       | 2.50109E-08    | Involved in lymphatic EC migration                                                                        | (84)             |
| <i>Il31ra</i>        | -2.083654763       | 2.219E-164     | IL-31 receptor; Regulates immunity, hematopoiesis, proliferation, apoptosis                               | (84)             |
| <i>Jak3</i>          | -2.047762948       | 6.67371E-21    | Marker of bone marrow endothelium                                                                         | (85)             |
| <i>Hlx</i>           | -2.039091723       | 6.08803E-33    | Negative regulation of endothelial cell sprouting                                                         | (86)             |
| <i>Gm42418</i>       | -1.932766499       | 0              | Pseudogene                                                                                                |                  |
| <i>Ctla2a</i>        | -1.914428933       | 3.3819E-99     | Inhibits EC proliferation and angiogenesis                                                                | (87)             |
| <i>Wbp1</i>          | -1.882749838       | 5.5348E-12     | Binds tumour suppressor WWOX                                                                              | (88)             |
| <i>2310039H08Rik</i> | -1.878559416       | 4.70367E-13    | Predicted gene                                                                                            |                  |
| <i>Srxn1</i>         | -1.877820154       | 1.95222E-06    | Inhibits smooth muscle cell proliferation and migration                                                   | (89)             |
| <i>Gngt2</i>         | -1.872098727       | 2.19706E-54    | Marker in esophageal cancer                                                                               | (90)             |
| <i>Cmss1</i>         | -1.864645757       | 0              | Part of the ribosome unit; binds mRNA                                                                     | (91)             |
| <i>Cyp26b1</i>       | -1.858356536       | 3.31131E-29    | Monoxygenase; interacts with retinoic acid; increased expression induces angiogenesis in infarcted hearts | (92)             |
| <i>Slc2a8</i>        | -1.857274319       | 1.80318E-06    | Glucose transporter; induces autophagy in hepatocytes                                                     | (93)             |

**Table S6.****Primer sequences**

| <b>Human</b>    |                            |                                   |
|-----------------|----------------------------|-----------------------------------|
|                 | <b>Forward</b>             | <b>Reverse</b>                    |
| <b>TRAIL</b>    | ACCAACGAGCTGAAGCAGAT       | CAAGTGCAAGTTGCTCAGGA              |
| <b>TRAIL-R1</b> | GTCCTGCTGCAGGTCGTACC       | GATGTCACTCCAGGGCGTAC              |
| <b>TRAIL-R2</b> | CCAACAAGACCTAGCTCCCCAGC    | AAGACTACGGCTGCAACTGTGACTCC        |
| <b>VEGF</b>     | ATGAACTTTCTGCTGTCTTGGGTG   | TCACCGCCTCGGCTTGTACAT             |
| <b>NOX4</b>     | CTGGAGGAGCTGGCTCGCCAACGAAG | GTGATCATGAGGAATAGCACCACCACCATGCAG |
| <b>HBEGF</b>    | ATCGTGGGGCTTCTCATGTTT      | TTAGTCATGCCAACTTCACTTT            |
| <b>ERBB2</b>    | TGTGACTGCCTGTCCCTACAA      | CCAGACCATAGCACACTCGG              |
| <b>EGFR</b>     | AGGCACGAGTAACAAGCTCAC      | ATGAGGACATAACCAGCCACC             |
| <b>β-ACTIN</b>  | AGCCATGTACGTAGCCATCC       | CTCTCAGCTGTGGTGGTGAA              |
| <b>Mouse</b>    |                            |                                   |
|                 | <b>Forward</b>             | <b>Reverse</b>                    |
| <b>TRAIL</b>    | AAGCTGAAGACGCTTCCAAGAT     | CCGGATAGCTGGTGTACTTGTA            |
| <b>TRAIL-R</b>  | GCAGAGAGGGTATTGACTACA      | GCATCGGGTTTCTACGACTTT             |
| <b>CD31</b>     | CTGCCAGTCCGAAAATGGAAC      | CTTCATCCACCGGGGCTATC              |
| <b>NG2</b>      | ACCATGCTACTCCGCAACAG       | CCGGTGAACATCTATGTGTACG            |
| <b>RGS5</b>     | GGGTTGCCTGTGAGAATTACA      | TGAAGTGGTCAATGTTACCTCT            |
| <b>PDGFRβ</b>   | GTGGTCCTTACCGTCATCTCTC     | GTGGAGTCGTAAGGCAACTGCA            |
| <b>HBEGF</b>    | CGGGGAGTGCAGATACCTG        | TTCTCCACTGGTAGAGTCAGC             |
| <b>ERBB2</b>    | GCTAGAGCGGCTTCTGAGAAA      | ACCACAGGGTCTACCACTTCC             |
| <b>EGFR</b>     | CAATGTTCCCATCGCTGTCGT      | TGTCTTTGCATGTGGCCTCAT             |
| <b>LAMC1</b>    | TGCCGGAGTTTGTAAATGCC       | CTGGTTGTTGTAGTCGGTCAG             |
| <b>ITGα1</b>    | GACAGCCCTTGAATAGACAC       | GTTGTCATGCGATTCTCCATCA            |
| <b>ITGβ1</b>    | ACTGTGATGCCGTATATTAGCAC    | GATATGCGTTGCTGACCAACA             |
| <b>β-ACTIN</b>  | AGCCATGTACGTAGCCATCC       | CTCTCAGCTGTGGTGGTGAA              |
| <b>HPRT</b>     | GTAAAGCAGTACAGCCCCAAA      | AGGGCATATCCAACAACAACTT            |

**Table S7.**

**Quality control and clustering steps for mouse scRNA-seq data set.**

| Sample                                                                     | QC steps -clean up<br>for doublet discrimination                                                                                                                                                                                                       | nPcs and resolution for<br>clustering | Expected %<br>doublets<br>According to 10X<br>recommendation | DF results                   |
|----------------------------------------------------------------------------|--------------------------------------------------------------------------------------------------------------------------------------------------------------------------------------------------------------------------------------------------------|---------------------------------------|--------------------------------------------------------------|------------------------------|
| <i>Trail</i> <sup>EC-/-</sup> control<br><br>Also called<br>EC_TKO_Control | Started with 14,092 cells.<br>nFeature_RNA > 200 & nFeature_RNA < 8000 & percent.mt < 18.03(1sd)<br>11,178 cells<br>removed cluster 4,6,9, 13-15, 23-25, 29<br>8,265 cells                                                                             | dims = 1:30,<br>resolution = 0.8      | 0.8*8.265~6.2%                                               | Doublet Singlet<br>471 7794  |
| <i>Trail</i> <sup>EC-/-</sup> HLI<br><br>Also called<br>EC_TKO_HLI         | Started with 20,000 cells.<br>nFeature_RNA > 200 & nFeature_RNA < 7000 & percent.mt < 20.23 (1sd)<br>17,625 cells<br>Removed cluster - 1,4,29<br>14,516 cells<br>Removed clusters 2,12<br>12, 900 cells<br>Removed clusters 2,16,25,28<br>11,540 cells | dims = 1:30,<br>resolution = 0.8      | 0.8*11.540 ~8.6%                                             | Doublet Singlet<br>931 10609 |
| <i>Trail</i> <sup>EC+/+</sup> control<br><br>Also called<br>EC_WT_Control  | Started with 22,046 cells.<br>nFeature_RNA > 100 & nFeature_RNA < 9000 & percent.mt < 23.08 (1sd)<br>17,893 cells<br>removed clusters -<br>2,5,11,15,16,17,18,21,22,26,28<br>12,460 cells<br>Removed clusters- 3,13,14<br>10,773 cells                 | dims = 1:30,<br>resolution = 0.8      | 0.8*10.773~8.2%                                              | Doublet Singlet<br>822 9951  |
| <i>Trail</i> <sup>EC+/+</sup> HLI<br><br>Also called<br>EC_WT_HLI          | Started with 12,862 cells.<br>nFeature_RNA > 100 & nFeature_RNA < 9000 & percent.mt < 11.41(1sd)<br>11,045 cells<br>Removed clusters- 4,12<br>9,963 cells<br>Removed cluster - 8<br>9,541 cells<br>Removed cluster -8<br>9,125 cells                   | dims = 1:30,<br>resolution = 0.8      | 0.8*9.125~7%                                                 | Doublet Singlet<br>595 8530  |

**Table S8.**

**Quality control and clustering steps for human scRNA-seq data set.**

| Sample          | QC steps -clean up<br>for doublet discrimination                                                                                                                                                                                                                                                                                                                                                                                                                            | nPcs and resolution<br>for clustering                                                                                      | Expected % doublets<br>According to 10X<br>recommendation | DF results                    |
|-----------------|-----------------------------------------------------------------------------------------------------------------------------------------------------------------------------------------------------------------------------------------------------------------------------------------------------------------------------------------------------------------------------------------------------------------------------------------------------------------------------|----------------------------------------------------------------------------------------------------------------------------|-----------------------------------------------------------|-------------------------------|
| <b>Non-ishc</b> | <p>Started with 33,697 cells.</p> <ol style="list-style-type: none"> <li>nFeature_RNA &gt; 200 &amp; nFeature_RNA &lt; 6000 &amp; percent.mt &lt; 39.39(1sd)<br/>28,387 cells</li> <li>removed clusters 0, 14      23,235 cells</li> <li>removed clusters 10, 20, 25, 28<br/>21,918 cells</li> <li>removed cluster 15,23      21,081 cells</li> <li>removed clusters 21, 23      20,945 cells</li> <li>removed cluster 3, 7, 8, 11 *after running doublet finder</li> </ol> | <p>dims = 1:40,<br/>resolution = 0.8</p> <p>dims = 1:35,<br/>resolution = 0.8</p>                                          | 0.8*20.945~16.8%                                          | Doublet Singlet<br>1592 19353 |
| <b>Isch</b>     | <p>Started with 28,870 cells.</p> <ol style="list-style-type: none"> <li>nFeature_RNA &gt; 200 &amp; nFeature_RNA &lt; 7500 &amp; percent.mt &lt; 25.00(1sd)      27,242 cells</li> <li>removed clusters 0, 10      23,321 cells</li> <li>removed clusters 19, 20      22,648 cells</li> <li>removed cluster 15,21,26,31 21,760 cells</li> <li>removed clusters 1, 22,23      17,813 cells</li> <li>removed clusters 22, 23      17,639 cells</li> </ol>                    | <p>dims = 1:40,<br/>resolution = 0.5</p> <p>dims = 1:40,<br/>resolution = 0.8</p> <p>dims = 1:30,<br/>resolution = 0.8</p> | 0.8*17.639~14.1%                                          | Doublet Singlet<br>1341 16298 |



## **Appendix Data S1: Supporting Data Values**

## REFERENCES AND NOTES

1. P. Song, D. Rudan, Y. Zhu, F. J. I. Fowkes, K. Rahimi, F. G. R. Fowkes, I. Rudan, Global, regional, and national prevalence and risk factors for peripheral artery disease in 2015: An updated systematic review and analysis. *Lancet Glob. Health* **7**, e1020–e1030 (2019).
2. K. Ziegler-Graham, E. J. MacKenzie, P. L. Ephraim, T. G. Trivison, R. Brookmeyer, Estimating the prevalence of limb loss in the United States: 2005 to 2050. *Arch. Phys. Med. Rehabil.* **89**, 422–429 (2008).
3. C. Emanuelli, P. Madeddu, Angiogenesis gene therapy to rescue ischaemic tissues: Achievements and future directions. *Br. J. Pharmacol.* **133**, 951–958 (2001).
4. R. Cao, Y. Xue, E. M. Hedlund, Z. Zhong, K. Tritsarlis, B. Tondelli, F. Lucchini, Z. Zhu, S. Dissing, Y. Cao, VEGFR1-mediated pericyte ablation links VEGF and PlGF to cancer-associated retinopathy. *Proc. Natl. Acad. Sci. U.S.A.* **107**, 856–861 (2010).
5. N. S. Azahri, M. M. Kavurma, Transcriptional regulation of tumour necrosis factor-related apoptosis-inducing ligand. *Cell. Mol. Life Sci.* **70**, 3617–3629 (2013).
6. S. P. Cartland, J. H. Erlich, M. M. Kavurma, TRAIL deficiency contributes to diabetic nephropathy in fat-fed ApoE<sup>-/-</sup> mice. *PLOS ONE* **9**, e92952 (2014).
7. S. P. Cartland, S. W. Genner, G. J. Martinez, S. Robertson, M. Kockx, R. C. Lin, J. F. O’Sullivan, Y. C. Koay, P. Manuneechi Cholan, M. A. Kebede, A. J. Murphy, S. Masters, M. R. Bennett, W. Jessup, L. Kritharides, C. Geczy, S. Patel, M. M. Kavurma, TRAIL-expressing monocyte/macrophages are critical for reducing inflammation and atherosclerosis. *iScience* **12**, 41–52 (2019).
8. S. P. Cartland, H. H. Harith, S. W. Genner, L. Dang, V. C. Cogger, M. Vellozzi, B. A. Di Bartolo, S. R. Thomas, L. A. Adams, M. M. Kavurma, Non-alcoholic fatty liver disease, vascular inflammation and insulin resistance are exacerbated by TRAIL deletion in mice. *Sci. Rep.* **7**, 1898 (2017).

9. J. Chan, L. Prado-Lourenco, L. M. Khachigian, M. R. Bennett, B. A. Di Bartolo, M. M. Kavurma, TRAIL promotes VSMC proliferation and neointima formation in a FGF-2-, Sp1 phosphorylation-, and NFκB-dependent manner. *Circ. Res.* **106**, 1061–1071 (2010).
10. B. Di Bartolo, J. Chan, M. Bennett, S. Cartland, S. Bao, B. Tuch, M. Kavurma, TNF-related apoptosis-inducing ligand (TRAIL) protects against diabetes and atherosclerosis in Apoe<sup>-/-</sup> mice. *Diabetologia* **54**, 3157–3167 (2011).
11. B. A. Di Bartolo, S. P. Cartland, L. Prado-Lourenco, T. S. Griffith, C. Gentile, J. Ravindran, N. S. Azahri, T. Thai, A. W. Yeung, S. R. Thomas, M. M. Kavurma, Tumor necrosis factor-related apoptosis-inducing ligand (TRAIL) promotes angiogenesis and ischemia-induced neovascularization via NADPH oxidase 4 (NOX4) and nitric oxide-dependent mechanisms. *J. Am. Heart Assoc.* **4**, e002527 (2015).
12. M. M. Kavurma, M. Schoppet, Y. V. Bobryshev, L. M. Khachigian, M. R. Bennett, Trail stimulates proliferation of vascular smooth muscle cells via activation of NF-κB and induction of insulin-like growth factor-1 receptor. *J. Biol. Chem.* **283**, 7754–7762 (2008).
13. P. Manuneehi Cholan, S. P. Cartland, L. Dang, B. S. Rayner, S. Patel, S. R. Thomas, M. M. Kavurma, TRAIL protects against endothelial dysfunction in vivo and inhibits angiotensin-II-induced oxidative stress in vascular endothelial cells in vitro. *Free Radic. Biol. Med.* **126**, 341–349 (2018).
14. S. P. Cartland, S. W. Genner, A. Zahoor, M. M. Kavurma, Comparative evaluation of TRAIL, FGF-2 and VEGF-A-induced angiogenesis in vitro and in vivo. *Int. J. Mol. Sci.* **17**, 2025 (2016).
15. P. Secchiero, A. Gonelli, E. Carnevale, F. Corallini, C. Rizzardi, S. Zacchigna, M. Melato, G. Zauli, Evidence for a proangiogenic activity of TNF-related apoptosis-inducing ligand. *Neoplasia* **6**, 364–373 (2004).
16. H. M. Rosevear, A. J. Lightfoot, T. S. Griffith, Conatumumab, a fully human mAb against death receptor 5 for the treatment of cancer. *Curr. Opin. Investig. Drugs* **11**, 688–698 (2010).

17. S. M. Craige, K. Chen, Y. Pei, C. Li, X. Huang, C. Chen, R. Shibata, K. Sato, K. Walsh, J. F. Keaney, Jr., NADPH oxidase 4 promotes endothelial angiogenesis through endothelial nitric oxide synthase activation. *Circulation* **124**, 731–740 (2011).
18. E. Vazquez-Liebanas, K. Nahar, G. Bertuzzi, A. Keller, C. Betsholtz, M. A. Mae, Adult-induced genetic ablation distinguishes PDGFB roles in blood-brain barrier maintenance and development. *J. Cereb. Blood Flow Metab.* **42**, 264–279 (2022).
19. S. Jin, C. F. Guerrero-Juarez, L. Zhang, I. Chang, R. Ramos, C. H. Kuan, P. Myung, M. V. Plikus, Q. Nie, Inference and analysis of cell-cell communication using CellChat. *Nat. Commun.* **12**, 1088 (2021).
20. A. N. Stratman, A. E. Schwindt, K. M. Malotte, G. E. Davis, Endothelial-derived PDGF-BB and HB-EGF coordinately regulate pericyte recruitment during vasculogenic tube assembly and stabilization. *Blood* **116**, 4720–4730 (2010).
21. S. S. Kemp, K. N. Aguera, B. Cha, G. E. Davis, Defining endothelial cell-derived factors that promote pericyte recruitment and capillary network assembly. *Arterioscler. Thromb. Vasc. Biol.* **40**, 2632–2648 (2020).
22. E. Iivanainen, L. Nelimarkka, V. Elenius, S. M. Heikkinen, T. T. Junttila, L. Sihombing, M. Sundvall, J. A. Maatta, V. J. Laine, S. Yla-Herttuala, S. Higashiyama, K. Alitalo, K. Elenius, Angiotensin-regulated recruitment of vascular smooth muscle cells by endothelial-derived heparin binding EGF-like growth factor. *FASEB J.* **17**, 1609–1621 (2003).
23. M. Yoshizumi, S. Kourembanas, D. H. Temizer, R. P. Cambria, T. Quertermous, M. E. Lee, Tumor necrosis factor increases transcription of the heparin-binding epidermal growth factor-like growth factor gene in vascular endothelial cells. *J. Biol. Chem.* **267**, 9467–9469 (1992).
24. G. Agnelli, J. J. F. Belch, I. Baumgartner, P. Giovvas, U. Hoffmann, Morbidity and mortality associated with atherosclerotic peripheral artery disease: A systematic review. *Atherosclerosis* **293**, 94–100 (2020).

25. S. J. Aitken, Peripheral artery disease in the lower limbs: The importance of secondary risk prevention for improved long-term prognosis. *Aust. J. Gen. Pract.* **49**, 239–244 (2020).
26. M. M. Kavurma, C. Bursill, C. P. Stanley, F. Passam, S. P. Cartland, S. Patel, J. Loa, G. A. Figtree, J. Golledge, S. Aitken, D. A. Robinson, Endothelial cell dysfunction: Implications for the pathogenesis of peripheral artery disease. *Front. Cardiovasc. Med.* **9**, 1054576 (2022).
27. P. Secchiero, A. Gonelli, E. Carnevale, D. Milani, A. Pandolfi, D. Zella, G. Zauli, TRAIL promotes the survival and proliferation of primary human vascular endothelial cells by activating the Akt and ERK pathways. *Circulation* **107**, 2250–2256 (2003).
28. J. Yu, E. D. deMuinck, Z. Zhuang, M. Drinane, K. Kauser, G. M. Rubanyi, H. S. Qian, T. Murata, B. Escalante, W. C. Sessa, Endothelial nitric oxide synthase is critical for ischemic remodeling, mural cell recruitment, and blood flow reserve. *Proc. Natl. Acad. Sci. U.S.A.* **102**, 10999–11004 (2005).
29. S. P. Cartland, R. C. Y. Lin, S. Genner, M. S. Patil, G. J. Martinez, J. Y. Barraclough, B. Gloss, A. Misra, S. Patel, M. M. Kavurma, Vascular transcriptome landscape of *Trail*<sup>-/-</sup> mice: Implications and therapeutic strategies for diabetic vascular disease. *FASEB J.* **34**, 9547–9562 (2020).
30. S. Volpato, L. Ferrucci, P. Secchiero, F. Corallini, G. Zuliani, R. Fellin, J. M. Guralnik, S. Bandinelli, G. Zauli, Association of tumor necrosis factor-related apoptosis-inducing ligand with total and cardiovascular mortality in older adults. *Atherosclerosis* **215**, 452–458 (2011).
31. A. Niessner, P. J. Hohensinner, K. Rychli, S. Neuhold, G. Zorn, B. Richter, M. Hulsmann, R. Berger, D. Mortl, K. Huber, J. Wojta, R. Pacher, Prognostic value of apoptosis markers in advanced heart failure patients. *Eur. Heart J.* **30**, 789–796 (2009).
32. P. Secchiero, F. Corallini, C. Ceconi, G. Parrinello, S. Volpato, R. Ferrari, G. Zauli, Potential prognostic significance of decreased serum levels of TRAIL after acute myocardial infarction. *PLOS ONE* **4**, e4442 (2009).

33. C. G. Pass, V. Palzkill, J. Tan, K. Kim, T. Thome, Q. Yang, B. Fazzone, S. T. Robinson, K. A. O'Malley, F. Yue, S. T. Scali, S. A. Berceli, T. E. Ryan, Single-nuclei RNA-sequencing of the gastrocnemius muscle in peripheral artery disease. *Circ. Res.* **133**, 791–809 (2023).
34. G. Turiel, T. Desgeorges, E. Masschelein, M. Birrer, J. Zhang, S. Engelberger, K. De Bock, Single cell compendium of the muscle microenvironment in peripheral artery disease reveals capillary endothelial heterogeneity and activation of resident macrophages. *BioRxiv* 545899 [Preprint]. 22 June 2023. <https://doi.org/10.1101/2023.06.21.545899>.
35. L. A. Grisanti, TRAIL and its receptors in cardiac diseases. *Front. Physiol.* **14**, 1256852 (2023).
36. B. Li, N. Djahanpour, A. Zamzam, M. H. Syed, S. Jain, R. Abdin, M. Qadura, Angiogenesis-related proteins as biomarkers for peripheral artery disease. *Heliyon* **9**, e20166 (2023).
37. N. S. Wilson, A. Yang, B. Yang, S. Couto, H. Stern, A. Gogineni, R. Pitti, S. Marsters, R. M. Weimer, M. Singh, A. Ashkenazi, Proapoptotic activation of death receptor 5 on tumor endothelial cells disrupts the vasculature and reduces tumor growth. *Cancer Cell* **22**, 80–90 (2012).
38. C. Riera-Domingo, E. Leite-Gomes, I. Charatsidou, P. Zhao, G. Carra, F. Cappellesso, L. Mourao, M. De Schepper, D. Liu, J. Serneels, M. G. Alameh, V. V. Shuvaev, T. Geukens, E. Isnaldi, H. Prenen, D. Weissman, V. R. Muzykantov, S. Soenen, C. Desmedt, C. Scheele, A. Sablina, M. Di Matteo, R. Martin-Perez, M. Mazzone, Breast tumors interfere with endothelial TRAIL at the premetastatic niche to promote cancer cell seeding. *Sci. Adv.* **9**, eadd5028 (2023).
39. J. D. Graves, J. J. Kordich, T. H. Huang, J. Piasecki, T. L. Bush, T. Sullivan, I. N. Foltz, W. Chang, H. Douangpanya, T. Dang, J. W. O'Neill, R. Mallari, X. Zhao, D. G. Branstetter, J. M. Rossi, A. M. Long, X. Huang, P. M. Holland, Apo2L/TRAIL and the death receptor 5 agonist antibody AMG 655 cooperate to promote receptor clustering and antitumor activity. *Cancer Cell* **26**, 177–189 (2014).
40. K. Kucka, H. Wajant, Receptor Oligomerization and its relevance for signaling by receptors of the tumor necrosis factor receptor superfamily. *Front. Cell Dev. Biol.* **8**, 615141 (2020).

41. M. M. Kavurma, N. Y. Tan, M. R. Bennett, Death receptors and their ligands in atherosclerosis. *Arterioscler. Thromb. Vasc. Biol.* **28**, 1694–1702 (2008).
42. L. M. Sedger, M. B. Glaccum, J. C. Schuh, S. T. Kanaly, E. Williamson, N. Kayagaki, T. Yun, P. Smolak, T. Le, R. Goodwin, B. Gliniak, Characterization of the in vivo function of TNF-alpha-related apoptosis-inducing ligand, TRAIL/Apo2L, using TRAIL/Apo2L gene-deficient mice. *Eur. J. Immunol.* **32**, 2246–2254 (2002).
43. D. Cheng, J. Talib, C. P. Stanley, I. Rashid, E. Michaelsson, E. L. Lindstedt, K. D. Croft, A. J. Kettle, G. J. Maghzal, R. Stocker, Inhibition of MPO (Myeloperoxidase) attenuates endothelial dysfunction in mouse models of vascular inflammation and atherosclerosis. *Arterioscler. Thromb. Vasc. Biol.* **39**, 1448–1457 (2019).
44. A. Johansson-Percival, Z. J. Li, D. D. Lakhiani, B. He, X. Wang, J. Hamzah, R. Ganss, Intratumoral LIGHT restores pericyte contractile properties and vessel integrity. *Cell Rep.* **13**, 2687–2698 (2015).
45. J. Wang, N. Niu, S. Xu, Z. G. Jin, A simple protocol for isolating mouse lung endothelial cells. *Sci. Rep.* **9**, 1458 (2019).
46. A. Boroujerdi, U. Tigges, J. V. Welser-Alves, R. Milner, Isolation and culture of primary pericytes from mouse brain. *Methods Mol. Biol.* **1135**, 383–392 (2014).
47. Q. P. Su, Z. W. Zhao, L. Meng, M. Ding, W. Zhang, Y. Li, M. Liu, R. Li, Y. Q. Gao, X. S. Xie, Y. Sun, Superresolution imaging reveals spatiotemporal propagation of human replication foci mediated by CTCF-organized chromatin structures. *Proc. Natl. Acad. Sci. U.S.A.* **117**, 15036–15046 (2020).
48. N. S. Azahri, B. A. Di Bartolo, L. M. Khachigian, M. M. Kavurma, Sp1, acetylated histone-3 and p300 regulate TRAIL transcription: Mechanisms for PDGF-BB-mediated VSMC proliferation and migration. *J. Cell. Biochem.* **13**, 2597–2606 (2012).



49. A. J. De Micheli, J. A. Spector, O. Elemento, B. D. Cosgrove, A reference single-cell transcriptomic atlas of human skeletal muscle tissue reveals bifurcated muscle stem cell populations. *Skelet. Muscle* **10**, 19 (2020).
50. G. X. Zheng, J. M. Terry, P. Belgrader, P. Ryvkin, Z. W. Bent, R. Wilson, S. B. Ziraldo, T. D. Wheeler, G. P. McDermott, J. Zhu, M. T. Gregory, J. Shuga, L. Montesclaros, J. G. Underwood, D. A. Masquelier, S. Y. Nishimura, M. Schnall-Levin, P. W. Wyatt, C. M. Hindson, R. Bharadwaj, A. Wong, K. D. Ness, L. W. Beppu, H. J. Deeg, C. McFarland, K. R. Loeb, W. J. Valente, N. G. Ericson, E. A. Stevens, J. P. Radich, T. S. Mikkelsen, B. J. Hindson, J. H. Bielas, Massively parallel digital transcriptional profiling of single cells. *Nat. Commun.* **8**, 14049 (2017).
51. Y. Hao, S. Hao, E. Andersen-Nissen, W. M. Mauck, 3rd, S. Zheng, A. Butler, M. J. Lee, A. J. Wilk, C. Darby, M. Zager, P. Hoffman, M. Stoeckius, E. Papalexi, E. P. Mimitou, J. Jain, A. Srivastava, T. Stuart, L. M. Fleming, B. Yeung, A. J. Rogers, J. M. McElrath, C. A. Blish, R. Gottardo, P. Smibert, R. Satija, Integrated analysis of multimodal single-cell data. *Cell* **184**, 3573–3587.e29 (2021).
52. P. L. Germain, A. Lun, C. Garcia Meixide, W. Macnair, M. D. Robinson, Doublet identification in single-cell sequencing data using scDbtFinder. *F1000Res* **10**, 979 (2021).
53. T. Wu, E. Hu, S. Xu, M. Chen, P. Guo, Z. Dai, T. Feng, L. Zhou, W. Tang, L. Zhan, X. Fu, S. Liu, X. Bo, G. Yu, clusterProfiler 4.0: A universal enrichment tool for interpreting omics data. *Innovation* **2**, 100141 (2021).
54. K. Steinwede, S. Henken, J. Bohling, R. Maus, B. Ueberberg, C. Brumshagen, E. L. Brincks, T. S. Griffith, T. Welte, U. A. Maus, TNF-related apoptosis-inducing ligand (TRAIL) exerts therapeutic efficacy for the treatment of pneumococcal pneumonia in mice. *J. Exp. Med.* **209**, 1937–1952 (2012).
55. K. He, T. Wang, X. Huang, Z. Yang, Z. Wang, S. Zhang, X. Sui, J. Jiang, L. Zhao, PPP1R14B is a diagnostic prognostic marker in patients with uterine corpus endometrial carcinoma. *J. Cell. Mol. Med.* **27**, 846–863 (2023).

56. A. C. Straub, A. W. Lohman, M. Billaud, S. R. Johnstone, S. T. Dwyer, M. Y. Lee, P. S. Bortz, A. K. Best, L. Columbus, B. Gaston, B. E. Isakson, Endothelial cell expression of haemoglobin alpha regulates nitric oxide signalling. *Nature* **491**, 473–477 (2012).
57. Y. Wu, Z. Chen, G. Xie, H. Zhang, Z. Wang, J. Zhou, F. Chen, J. Li, L. Chen, H. Niu, H. Wang, RNA m(1)A methylation regulates glycolysis of cancer cells through modulating ATP5D. *Proc. Natl. Acad. Sci. U.S.A.* **119**, e2119038119 (2022).
58. J. Wang, E. Zhao, B. Geng, W. Zhang, Z. Li, Q. Liu, W. Liu, W. Zhang, W. Hou, N. Zhang, Z. Liu, B. You, P. Wu, X. Li, Downregulation of UBB potentiates SP1/VEGFA-dependent angiogenesis in clear cell renal cell carcinoma. *Oncogene* **43**, 1386–1396 (2024).
59. K. C. Chiang, S. T. Huang, R. C. Wu, S. C. Huang, T. S. Yeh, M. H. Chen, J. T. Hsu, L. W. Chen, S. F. Kuo, H. Y. Chueh, H. H. Juang, S. I. Hung, C. N. Yeh, J. S. Pang, Interferon alpha-inducible protein 27 is an oncogene and highly expressed in cholangiocarcinoma patients with poor survival. *Cancer Manag. Res.* **11**, 1893–1905 (2019).
60. L. Pan, H. Xiao, R. Liao, Q. Chen, C. Peng, Y. Zhang, T. Mu, Z. Wu, Fatty acid binding protein 5 promotes tumor angiogenesis and activates the IL6/STAT3/VEGFA pathway in hepatocellular carcinoma. *Biomed. Pharmacother.* **106**, 68–76 (2018).
61. D. D. Cheng, S. J. Li, B. Zhu, S. M. Zhou, Q. C. Yang, EEF1D overexpression promotes osteosarcoma cell proliferation by facilitating Akt-mTOR and Akt-bad signaling. *J. Exp. Clin. Cancer Res.* **37**, 50 (2018).
62. L. Yang, Z. Dong, S. Li, T. Chen, ESM1 promotes angiogenesis in colorectal cancer by activating PI3K/Akt/mTOR pathway, thus accelerating tumor progression. *Aging* **15**, 2920–2936 (2023).
63. J. Wu, F. Lu, B. Yu, W. Wang, X. Ye, The oncogenic role of SNRPB in human tumors: A pan-cancer analysis. *Front. Mol. Biosci.* **9**, 994440 (2022).
64. K. Ohashi, T. Enomoto, Y. Joki, R. Shibata, Y. Ogura, Y. Kataoka, Y. Shimizu, T. Kambara, Y. Uemura, D. Yuasa, K. Matsuo, S. Hayakawa, M. Hiramatsu-Ito, T. Murohara, N. Ouchi, Neuron-

derived neurotrophic factor functions as a novel modulator that enhances endothelial cell function and revascularization processes. *J. Biol. Chem.* **289**, 14132–14144 (2014).

65. I. Dragoni, M. Mariotti, G. G. Consalez, M. R. Soria, J. A. Maier, EDF-1, a novel gene product down-regulated in human endothelial cell differentiation. *J. Biol. Chem.* **273**, 31119–31124 (1998).
66. A. Buhler, S. Berger, F. Bengsch, G. Martin, H. Han, S. Vierkotten, A. Pielen, D. Boehringer, G. Schlunck, S. Fauser, H. T. Agostini, T. Reinheckel, A. Stahl, Cathepsin proteases promote angiogenic sprouting and laser-induced choroidal neovascularisation in mice. *Exp. Eye Res.* **115**, 73–78 (2013).
67. M. Kamal, D. L. Holliday, E. E. Morrison, V. Speirs, C. Toomes, S. M. Bell, Loss of CSMD1 expression disrupts mammary duct formation while enhancing proliferation, migration and invasion. *Oncol. Rep.* **38**, 283–292 (2017).
68. P. Li, C. M. Halabi, R. Stewart, A. Butler, B. Brown, X. Xia, C. Santi, S. England, J. Ferreira, R. P. Mecham, L. Salkoff, Sodium-activated potassium channels moderate excitability in vascular smooth muscle. *J. Physiol.* **597**, 5093–5108 (2019).
69. D. Pensold, G. Zimmer, Single-cell transcriptomics reveals regulators of neuronal migration and maturation during brain development. *J. Exp. Neurosci.* **12**, 1179069518760783 (2018).
70. Y. Y. Cheng, C. M. Wright, M. B. Kirschner, M. Williams, K. H. Sarun, V. Sytnyk, I. Leshchynska, J. J. Edelman, M. P. Valley, B. C. McCaughan, S. Klebe, N. van Zandwijk, R. C. Lin, G. Reid, KCa1.1, a calcium-activated potassium channel subunit alpha 1, is targeted by miR-17-5p and modulates cell migration in malignant pleural mesothelioma. *Mol. Cancer* **15**, 44 (2016).
71. S. Elbitar, M. Renard, P. Arnaud, N. Hanna, M. P. Jacob, D. C. Guo, K. Tsutsui, M. S. Gross, K. Kessler, L. Tosolini, V. Dattilo, S. Dupont, J. Jonquet, M. Langeois, L. Benarroch, M. Aubart, Y. Ghaleb, Y. Abou Khalil, M. Varret, P. El Khoury, B. Ho-Tin-Noe, Y. Alembik, S. Gaertner, B. Isidor, L. Gouya, O. Milleron, K. Sekiguchi, D. Milewicz, J. De Backer, C. Le Goff, J. B.

- Michel, G. Jondeau, L. Y. Sakai, C. Boileau, M. Abifadel, Pathogenic variants in THSD4, encoding the ADAMTS-like 6 protein, predispose to inherited thoracic aortic aneurysm. *Genet. Med.* **23**, 111–122 (2021).
72. Y. Li, M. Xiao, F. Guo, The role of Sox6 and Netrin-1 in ovarian cancer cell growth, invasiveness, and angiogenesis. *Tumour Biol.* **39**, 1010428317705508 (2017).
73. W. Du, L. Huang, X. Tang, J. Li, X. Li, Ephrin-A5 is involved in retinal neovascularization in a mouse model of oxygen-induced retinopathy. *Biomed. Res. Int.* **2020**, 7161027 (2020).
74. C. L. Speyer, A. H. Hachem, A. A. Assi, J. S. Johnson, J. A. DeVries, D. H. Gorski, Metabotropic glutamate receptor-1 as a novel target for the antiangiogenic treatment of breast cancer. *PLOS ONE* **9**, e88830 (2014).
75. D. Zhu, A. Shen, Y. Wang, X. Gu, J. Gu, Developmental regulation of beta-1,3-galactosyltransferase-1 gene expression in mouse brain. *FEBS Lett.* **538**, 163–167 (2003).
76. L. Wang, E. R. Hauser, S. H. Shah, D. Seo, P. Sivashanmugam, S. T. Exum, S. G. Gregory, C. B. Granger, J. L. Haines, C. J. Jones, D. Crossman, C. Haynes, W. E. Kraus, N. J. Freedman, M. A. Pericak-Vance, P. J. Goldschmidt-Clermont, J. M. Vance, Polymorphisms of the tumor suppressor gene LSAMP are associated with left main coronary artery disease. *Ann. Hum. Genet.* **72**, 443–453 (2008).
77. M. Hiwatari, M. Seki, R. Matsuno, K. Yoshida, T. Nagasawa, A. Sato-Otsubo, S. Yamamoto, M. Kato, K. Watanabe, M. Sekiguchi, S. Miyano, S. Ogawa, J. Takita, Novel TENM3-ALK fusion is an alternate mechanism for ALK activation in neuroblastoma. *Oncogene* **41**, 2789–2797 (2022).
78. L. A. Fatima, R. S. Campello, R. S. Santos, H. S. Freitas, A. P. Frank, U. F. Machado, D. J. Clegg, Estrogen receptor 1 (ESR1) regulates VEGFA in adipose tissue. *Sci. Rep.* **7**, 16716 (2017).
79. P. Andrikopoulos, A. Baba, T. Matsuda, M. B. A. Djamgoz, M. M. Yaqoob, S. A. Eccles, Ca<sup>2+</sup> influx through reverse mode Na<sup>+</sup>/Ca<sup>2+</sup> exchange is critical for vascular endothelial growth factor-

mediated extracellular signal-regulated kinase (ERK) 1/2 activation and angiogenic functions of human endothelial cells. *J. Biol. Chem.* **286**, 37919–37931 (2011).

80. B. Chakravarti, J. Yang, K. E. Ahlers-Dannen, Z. Luo, H. A. Flaherty, D. K. Meyerholz, M. E. Anderson, R. A. Fisher, Essentiality of regulator of G protein signaling 6 and oxidized Ca<sup>2+</sup>/calmodulin-dependent protein kinase II in notch signaling and cardiovascular development. *J. Am. Heart Assoc.* **6**, e007038 (2017).
81. T. C. S. T. Keller, C. Lechauve, A. S. Keller, G. B. Broseghini-Filho, J. T. Butcher, H. R. Askew Page, A. Islam, Z. Y. Tan, L. J. DeLalio, S. Brooks, P. Sharma, K. Hong, W. Xu, A. S. Padilha, C. A. Ruddiman, A. K. Best, E. Macal, D. B. Kim-Shapiro, G. Christ, Z. Yan, M. M. Cortese-Krott, K. Ricart, R. Patel, T. P. Bender, S. K. Sonkusare, M. J. Weiss, H. Ackerman, L. Columbus, B. E. Isakson, Endothelial alpha globin is a nitrite reductase. *Nat. Commun.* **13**, 6405 (2022).
82. T. Tsukui, K. H. Sun, J. B. Wetter, J. R. Wilson-Kanamori, L. A. Hazelwood, N. C. Henderson, T. S. Adams, J. C. Schupp, S. D. Poli, I. O. Rosas, N. Kaminski, M. A. Matthay, P. J. Wolters, D. Sheppard, Collagen-producing lung cell atlas identifies multiple subsets with distinct localization and relevance to fibrosis. *Nat. Commun.* **11**, 1920 (2020).
83. A. Yamauchi, T. Sakurai, A. Kamiyoshi, Y. Ichikawa-Shindo, H. Kawate, K. Igarashi, Y. Toriyama, M. Tanaka, T. Liu, X. Xian, A. Imai, L. Zhai, S. Owa, T. Arai, T. Shindo, Functional differentiation of RAMP2 and RAMP3 in their regulation of the vascular system. *J. Mol. Cell. Cardiol.* **77**, 73–85 (2014).
84. Q. Zhang, P. Putheti, Q. Zhou, Q. Liu, W. Gao, Structures and biological functions of IL-31 and IL-31 receptors. *Cytokine Growth Factor Rev.* **19**, 347–356 (2008).
85. J. G. Barcia Duran, T. Lu, S. Houghton, F. Geng, R. Schreiner, J. Xiang, S. Rafii, D. Redmond, R. Lis, Endothelial Jak3 expression enhances pro-hematopoietic angiocrine function in mice. *Commun. Biol.* **4**, 406 (2021).

86. J. Testori, B. Schweighofer, I. Helfrich, C. Sturtzel, K. Lipnik, S. Gesierich, P. Nasarre, R. Hofer-Warbinek, M. Bilban, H. G. Augustin, E. Hofer, The VEGF-regulated transcription factor HLX controls the expression of guidance cues and negatively regulates sprouting of endothelial cells. *Blood* **117**, 2735–2744 (2011).
87. K. Maruyama, K. Yoneda, S. Sugita, Y. Yamamoto, M. Koike, C. Peters, Y. Uchiyama, K. Nishida, CTLA-2 Alpha is a potent inhibitor of angiogenesis in murine ocular tissue. *Antioxidants* **10**, 456 (2021).
88. C. B. McDonald, L. Buffa, T. Bar-Mag, Z. Salah, V. Bhat, D. C. Mikles, B. J. Deegan, K. L. Seldeen, A. Malhotra, M. Sudol, R. I. Aqeilan, Z. Nawaz, A. Farooq, Biophysical basis of the binding of WWOX tumor suppressor to WBP1 and WBP2 adaptors. *J. Mol. Biol.* **422**, 58–74 (2012).
89. H. Jiang, Y. Zhao, P. Feng, Y. Liu, Sulfiredoxin-1 inhibits PDGF-BB-induced vascular smooth muscle cell proliferation and migration by enhancing the activation of Nrf2/ARE signaling. *Int. Heart J.* **63**, 113–121 (2022).
90. G. M. Liu, X. Ji, T. C. Lu, L. W. Duan, W. Y. Jia, Y. Liu, M. L. Sun, Y. G. Luo, Comprehensive multi-omics analysis identified core molecular processes in esophageal cancer and revealed GNGT2 as a potential prognostic marker. *World J. Gastroenterol.* **25**, 6890–6901 (2019).
91. B. Lau, O. Beine-Golovchuk, M. Kornprobst, J. Cheng, D. Kressler, B. Jady, T. Kiss, R. Beckmann, E. Hurt, Cms1 coordinates stepwise local 90S pre-ribosome assembly with timely snR83 release. *Cell Rep.* **41**, 111684 (2022).
92. B. Messner, J. Kern, D. Wiedemann, S. Schwaiger, A. Turkcan, C. Ploner, A. Trockenbacher, K. Aumayr, N. Bonaros, G. Laufer, H. Stuppner, G. Untergasser, D. Bernhard, 5-Methoxyeoligin, a lignan from Edelweiss, stimulates CYP26B1-dependent angiogenesis in vitro and induces arteriogenesis in infarcted rat hearts in vivo. *PLOS ONE* **8**, e58342 (2013).

93. A. L. Mayer, C. B. Higgins, M. R. Heitmeier, T. E. Kraft, X. Qian, J. R. Crowley, K. L. Hyc, W. L. Beatty, K. E. Yarasheski, P. W. Hruz, B. J. DeBosch, SLC2A8 (GLUT8) is a mammalian trehalose transporter required for trehalose-induced autophagy. *Sci. Rep.* **6**, 38586 (2016).
